# Supplementary material
Source: PubMed Central journal article supplement (PMC2802343)
Supplement: NIHMS166736-supplement-Spectral_Data.pdf [file NIHMS166736-supplement-Spectral_Data.pdf]

**Supporting Information**  
*Journal of Organic Chemistry*

“Synthesis of Carbapoyochelins via Diastereoselective Azidation of 5-(Ethoxycarbonyl)methylproline Derivatives”

Wathsala Liyanage, Laksiri Weerasinghe, Roland K. Strong, and Juan R. Del Valle

**CONTENTS**

|                                                |         |
|------------------------------------------------|---------|
| Experimental procedures                        | S2-S5   |
| <sup>1</sup> H NMR Spectrum of <b>5</b>        | S6      |
| <sup>13</sup> C NMR Spectrum of <b>5</b>       | S7      |
| <sup>1</sup> H NMR Spectrum of <b>10</b>       | S8      |
| <sup>13</sup> C NMR Spectrum of <b>10</b>      | S9      |
| <sup>1</sup> H NMR Spectrum of <b>11</b>       | S10     |
| <sup>13</sup> C NMR Spectrum of <b>11</b>      | S11     |
| <sup>1</sup> H NMR Spectrum of <b>12</b>       | S12     |
| <sup>13</sup> C NMR Spectrum of <b>12</b>      | S13     |
| <sup>1</sup> H NMR Spectrum of <b>13</b>       | S14     |
| <sup>13</sup> C NMR Spectrum of <b>13</b>      | S15     |
| <sup>1</sup> H NMR Spectrum of <b>14</b>       | S16     |
| <sup>13</sup> C NMR Spectrum of <b>14</b>      | S17     |
| <sup>1</sup> H NMR Spectrum of <b>15</b>       | S18     |
| <sup>13</sup> C NMR Spectrum of <b>15</b>      | S19     |
| <sup>1</sup> H NMR Spectrum of <b>2</b> · TFA  | S20     |
| <sup>13</sup> C NMR Spectrum of <b>2</b> · TFA | S21     |
| HPLC Trace for <b>2</b> · TFA                  | S22     |
| ESI-MS (RT=10.38 min) <b>2</b> · TFA           | S23     |
| <sup>1</sup> H NMR Spectrum of <b>3</b> · TFA  | S24     |
| <sup>13</sup> C NMR Spectrum of <b>3</b> · TFA | S25     |
| HPLC Trace for <b>3</b> · TFA                  | S26     |
| ESI-MS (RT=9.76 min) <b>3</b> · TFA            | S27     |
| <sup>1</sup> H NMR Spectrum of <b>16</b>       | S28     |
| <sup>13</sup> C NMR Spectrum of <b>16</b>      | S29     |
| X-ray crystal structure of <b>16</b>           | S30-S31 |

**General.** Unless stated otherwise, reactions were performed in flame-dried glassware under a positive pressure of argon using dry solvents. Commercial grade reagents and solvents were used without further purification except where noted. Diethyl ether, dichloromethane, and tetrahydrofuran were purified by solvent purification system. Other anhydrous solvents were purchased directly from chemical suppliers. Thin-layer chromatography (TLC) was performed using silica gel 60 F<sub>254</sub> pre-coated plates (0.25 mm). Flash chromatography was performed using silica gel (40 μm particle size). The purity of all compounds was judged by TLC analysis (single spot/ two solvent systems) using a UV lamp or CAM or ninhydrin or basic KMnO<sub>4</sub> for detection purposes. NMR spectra were recorded on 300 MHz and 400 MHz spectrometers. <sup>1</sup>H and <sup>13</sup>C NMR chemical shifts are reported as δ using residual solvent as an internal standard. Analytical high performance liquid chromatography (HPLC) was performed C<sub>18</sub> reverse phase analytical column. HPLC elution was carried out with a 20 min linear gradient of 0% - 90% MeCN in water (containing 0.1% formic acid buffer).

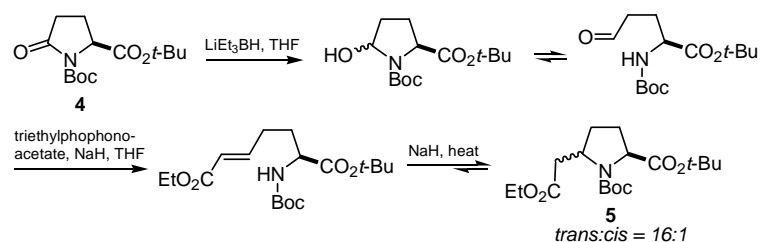

**(2S,5S)-5-Ethoxycarbonylmethylpyrrolidine-1,2-dicarboxylic acid di-tert-butyl ester (5).** A solution of **4** (3.00 g, 10.51 mmol) in THF (30 mL) was treated dropwise at -78 °C with LiEt<sub>3</sub>BH (1M solution in THF, 12.62 mL, 12.65 mmol), stirred at -78 °C for 30 min, and carefully quenched with sat. aq. NaHCO<sub>3</sub> (10 mL). The mixture was warmed to -15 °C and hydrogen peroxide (30% in water, 5.0 mL) was added dropwise. After stirring at 0 °C for 30 min, the solution was decanted from a white solid residue and concentrated. The crude material was taken up in Et<sub>2</sub>O, washed with sat. aq. NaHCO<sub>3</sub>, dried over MgSO<sub>4</sub>, filtered, and evaporated under reduced pressure. The crude *N*-acyloxyaminal was used in the next step without further purification.

A suspension of sodium hydride (60% dispersion in mineral oil, 0.59 g, 14.72 mmol) in THF (30 mL) was treated dropwise with triethylphosphonoacetate (3.16 mL, 15.77 mmol) and stirred for 2 h at RT. The reaction was cooled to -15 °C and a solution of the above *N*-acyloxyaminal in THF (20 mL) was added dropwise. After the addition, the reaction was allowed to warm to RT and stirred 18 h, then treated with an additional 0.21 g of 60% NaH (5.26 mmol) and heated to 50 °C for 4 h, then cooled to RT and poured carefully into sat. aq. NaHCO<sub>3</sub> (failure to heat the reaction with additional NaH resulted in isolation of the ring-opened enoate as the major product). The mixture was extracted with EtOAc, dried over MgSO<sub>4</sub>, filtered, and evaporated under reduced pressure to furnish the crude diester. Purification by flash chromatography over silica gel (20% EtOAc/hexanes as eluant) gave **5** as white solid (3.16 g, 84% from **4**). <sup>1</sup>H NMR of crude **10** (*vide infra*) later revealed compound **5** to be a 16:1 trans:cis mixture of diastereomers. <sup>1</sup>H NMR (300MHz, CDCl<sub>3</sub>) for the major trans isomer δ 4.41-4.25 (m, 1H), 4.20-4.08 (m, 3H), 2.97 and 2.87 (2dd, J = 15.2, 3.4 Hz, 1H, rotamers), 2.32-2.05 (m, 3H), 1.91 (q, J = 5.9 Hz, 1H), 1.74 (m, 1H), 1.47 and 1.43 (2s, 9H, rotamers), 1.44 and 1.42 (2s, 9H, rotamers), 1.25 (q, J = 7.0 Hz, 3H); <sup>13</sup>C NMR (75 MHz, CDCl<sub>3</sub>) δ 171.9, 171.4, 154.0, 153.6,

90.0, 80.1, 79.9, 60.4, 60.3, 54.7, 39.4, 38.4, 28.4, 28.3, 28.0, 27.9, 14.2; ESI-MS (m/z) [MH]<sup>+</sup> calcd for C<sub>18</sub>H<sub>31</sub>NO<sub>6</sub> 358.22, found 358.35.

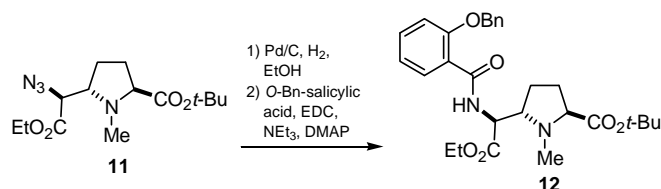

**(2S,5S,1'S)-5-[(2-Benzyloxybenzoylamino)-ethoxycarbonylmethyl]-1-methylpyrrolidine-2-carboxylic acid *tert*-butyl ester (12):** A solution of azide **11** (250 mg, 0.80 mmol) in EtOH (5 mL) was treated with a catalytic amount of 10% Pd/C and placed under H<sub>2</sub> atmosphere (balloon). After stirring at RT for 18 h, the mixture was purged with a stream of Ar and filtered through celite with EtOAc rinsing. Evaporation of the filtrate gave the intermediate diamine as a white solid (220 mg, 96% yield) which was taken up directly in CH<sub>2</sub>Cl<sub>2</sub> (2mL) and treated with 2-benzyloxy-benzoic acid ethyl ester (200 mg, 0.90 mmol), EDC·HCl (180 mg, 0.96 mmol), NEt<sub>3</sub> (130 μL 0.96 mmol), and a catalytic amount of DMAP. The reaction was stirred 12 h at RT, concentrated, and the crude residue was purified by chromatography over silica gel (5-30% EtOAc/hexanes gradient as eluent) to give amide **12** as a sticky white foam (370 mg, 93% from **12**). <sup>1</sup>H NMR (300 MHz, CDCl<sub>3</sub>) δ 8.38 (d, J = 6.8 Hz, 1H), 8.23 (dd, J = 7.9, 2.1 Hz, 1H), 7.50-7.35 (m, 6H), 7.05 (m, 2H), 5.21 (m, 2H), 4.86 (dd, J = 6.7, 3.8 Hz, 1H), 4.19 (q, J = 7.0 Hz, 2H), 3.50 (ddd, J = 8.8, 5.0, 3.8 Hz, 1H), 3.37 (dd, J = 7.6, 1.5 Hz, 1H), 2.40 (s, 3H), 1.84-1.35 (m, 4H), 1.43 (s, 9H), 1.26 (t, J = 7.0 Hz, 3H); <sup>13</sup>C NMR (75 MHz, CDCl<sub>3</sub>) δ 173.4, 171.2, 165.4, 157.0, 135.6, 132.8, 132.6, 128.9, 128.7, 128.2, 121.6, 121.4, 112.7, 80.8, 71.2, 67.2, 63.0, 61.0, 53.6, 34.8, 28.2, 27.5, 25.0, 14.2; HRMS (ESI-TOF) (m/z) [MH]<sup>+</sup> calcd for C<sub>28</sub>H<sub>36</sub>N<sub>2</sub>O<sub>6</sub> 497.2646, found 497.2647.

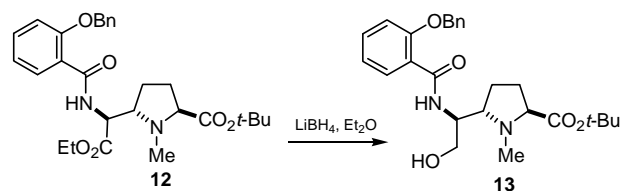

**(2S,5S,1'S)-5-[1-(2-Benzyloxybenzoylamino)-2-hydroxyethyl]-1-methylpyrrolidine-2-carboxylic acid *tert*-butyl ester (13).** A solution of **12** (390 mg, 0.78 mmol) in Et<sub>2</sub>O (4 mL) was treated with LiBH<sub>4</sub> (2M solution in THF, 580 μL, 1.16 mmol) and stirred for 12 h at RT. The reaction was quenched by addition of 1M NaOH (6 mL), stirred for an additional 10 min, then diluted with water and extracted with EtOAc. The combined organic layers were dried over Na<sub>2</sub>SO<sub>4</sub>, filtered, and evaporated and the crude residue purified by chromatography over silica gel (60% EtOAc/hexanes eluant) to give alcohol **13** as a sticky white foam (249 mg, 70%). <sup>1</sup>H NMR (300 MHz, CDCl<sub>3</sub>) δ 8.58 (d, J = 4.0 Hz, 1H), 8.19 (d, J = 8.0, 2.0 Hz, 1H), 7.41-7.34 (m, 6H), 7.06 (m, 1H), 6.98 (d, J = 8.4 Hz, 1H), 5.4 (bs, 1H), 5.23 (s, 2H), 4.04 (m, 1H), 3.78 (dd, J = 11.6, 5.6 Hz, 1H), 3.63 (dd, 11.6, 2.4 Hz, 1H), 3.42 (dd, J = 7.6, 1.6 Hz, 1H), 3.30 (ddd, J = 8.8, 5.6, 3.2 Hz, 1H), 2.31 (s, 3H), 2.00 (m, 1H), 1.84-1.62 (m, 2H), 1.49 (m, 1H), 1.43 (s, 9H); <sup>13</sup>C NMR (75 MHz, CDCl<sub>3</sub>) δ 172.9, 167.0, 156.6, 135.7, 132.8, 132.3, 128.9, 128.6, 127.4, 122.0,

121.8, 121.5, 112.9, 81.1, 71.0, 67.3, 65.3, 63.6, 54.6, 35.4, 28.2, 27.6, 25.3; HRMS (ESI-TOF) (m/z) [MH]<sup>+</sup> calcd for C<sub>26</sub>H<sub>34</sub>N<sub>2</sub>O<sub>5</sub> 455.2546, found 455.2550.

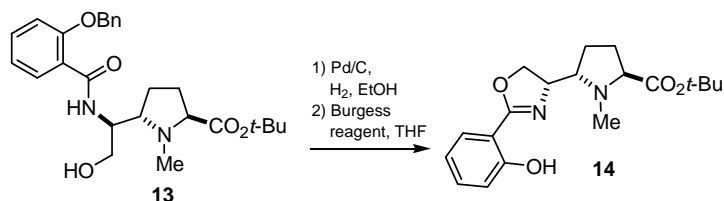

**(2*S*,5*S*,4'*S*)-5-[2-(2-Hydroxyphenyl)-4,5-dihydrooxazol-4-yl]-1-methylpyrrolidine-2-carboxylic acid *tert*-butyl ester (14).** A solution of **13** (190 mg, 0.42 mmol) in EtOH (2 mL) was treated with a catalytic amount of 10% Pd/C and placed under H<sub>2</sub> atmosphere (balloon). After stirring 12 h at RT, the mixture was purged with a stream of Ar, filtered over celite with EtOAc rinsing and evaporated to give the crude phenol intermediate. Purification by chromatography over silica gel (60% EtOAc/hexanes eluant) gave the pure phenol (120 mg, 78%).

Data for (2*S*,5*S*,1'*S*)-5-[1-(2-Benzyloxybenzoylamino)-2-hydroxyethyl]-1-methylpyrrolidine-2-carboxylic acid *tert*-butyl ester: <sup>1</sup>H NMR (300 MHz, CDCl<sub>3</sub>) δ 12.17 (s, 1H), 7.44-7.33 (m, 3H), 6.99 (dd, J = 8.0, 1.1 Hz, 1H), 6.86 (ddd, J = 8.0, 1.1 Hz, 1H), 3.97-3.92 (m, 2H), 3.75-3.68 (m, 2H), 3.52-3.47 (m, 1H), 2.28-2.01 (m, 2H), 1.94-1.87 (m, 1H), 1.72-1.62 (m, 1H), 1.47 (s, 9H); <sup>13</sup>C NMR (75 MHz, CDCl<sub>3</sub>) δ 172.5, 170.9, 161.4, 134.3, 125.6, 118.7, 114.24, 81.4, 67.5, 64.0, 63.9, 54.0, 36.1, 28.1, 28.0, 25.7; ESI-MS (m/z) [MH]<sup>+</sup> calcd for C<sub>19</sub>H<sub>28</sub>N<sub>2</sub>O<sub>5</sub> 365.20, found 365.34.

A solution of the above phenol (130 mg, 0.36 mmol) in THF (2mL) was treated with 1.5 equiv. of Burgess reagent, stirred for 30min at RT, then at 60 °C for an additional 30min. The mixture was concentrated and the crude residue purified by chromatography over silica gel (60% EtOAc/hexanes eluant) to give **14** as a white solid (110 mg, 89%). <sup>1</sup>H NMR (300 MHz, CDCl<sub>3</sub>) δ 12.24 (s, 1H), 7.64 (dd, J = 7.9, 1.5 Hz, 1H), 7.37 (ddd, J = 8.5, 7.3, 1.8 Hz, 1H), 7.00 (m, 1H), 6.86 (ddd, J = 7.9, 7.3, 1.2 Hz, 1H), 4.49 (m, 2H), 4.22 (m, 1H), 3.65 (dd, J = 7.9, 1.8 Hz, 1H), 3.34 (m, 1H), 2.48 (s, 3H), 2.22 (m, 1H), 2.02 (m, 1H), 1.78 (ddt, 12.9, 8.8, 2.1 Hz, 1H), 1.58 (m, 1H), 1.47 (s, 9H); <sup>13</sup>C NMR (75 MHz, CDCl<sub>3</sub>) δ 173.6, 165.7, 159.9, 133.3, 128.0, 118.6, 116.7, 110.5, 80.8, 69.0, 68.7, 68.5, 65.4, 36.7, 28.2, 28.1, 26.7; mp = 75-78 °C; HRMS (ESI-TOF) (m/z) [MH]<sup>+</sup> calcd for C<sub>19</sub>H<sub>26</sub>N<sub>2</sub>O<sub>4</sub> 347.1965, found 347.1974.

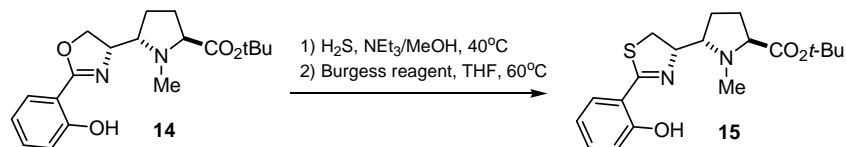

**(2*S*,5*S*,4'*S*)-5-[2-(2-Hydroxyphenyl)-4,5-dihydrothiazol-4-yl]-1-methylpyrrolidine-2-carboxylic acid *tert*-butyl ester (15).** A solution of **14** (120 mg, 0.35 mmol) was dissolved in 10 mL of 1:1 NEt<sub>3</sub>:MeOH at RT in a pressure flask. Hydrogen sulfide gas was then bubbled through the stirring solution for 20 min, after which the pressure flask was closed and warmed to 40 °C. The reaction was monitored periodically by LCMS and stirred at 40 °C for 5d (> 90% consumption of starting material). The reaction was then purged of H<sub>2</sub>S by bubbling a stream of

Ar through the solution for 15 min. Concentration and drying under vacuum gave a yellow solid which was used directly in the subsequent cyclodehydration.

The crude thioamide was taken up in 4 mL of THF, treated with Burgess reagent (124 mg, 0.52 mmol) and heated to 60 °C. After 1 hr, LCMS indicated complete consumption of the thioamide intermediate. The reaction was cooled to room temperature and filtered through a short silica pad with EtOAc rinsing. The filtrate was concentrated in vacuo and the crude residue purified by chromatography over silica gel (15% EtOAc/hexanes eluant) to give **15** as an off-white solid (48 mg, 38% from **14**). <sup>1</sup>H NMR (400 MHz, CDCl<sub>3</sub>) δ 12.80 (bs, 1H), 7.40-7.30 (m, 2H), 6.98 (dd, J = 8.2, 0.8 Hz, 1H), 6.86 (m, 1H), 4.81 (ddd, J = 10.2, 9.0, 3.1 Hz, 1H), 3.67 (dd, J = 7.8, 1.6 Hz, 1H), 3.52 (dt, J = 9.4, 3.9 Hz), 3.34 (dd, J = 10.5, 8.6 Hz, 1H), 3.21 (t, J = 10.5, 1H), 2.51 (s, 3H), 2.25 (dq, J = 12.9, 9.4 Hz, 1H), 2.03 (m, 1H), 1.79 (ddt, J = 12.9, 9.0, 2.0 Hz, 1H), 1.67 (m, 1H), 1.47 (s, 9H); <sup>13</sup>C NMR (100 MHz, CDCl<sub>3</sub>) δ 173.9, 171.5, 159.4, 133.0, 130.6, 118.9, 117.2, 116.6, 81.0, 79.6, 68.6, 66.0, 36.7, 33.0, 28.5, 28.4, 27.0; mp = 133 °C; HRMS (ESI-TOF) (m/z) [MH]<sup>+</sup> calcd for C<sub>19</sub>H<sub>26</sub>N<sub>2</sub>O<sub>3</sub>S 363.1737, found 363.1753.

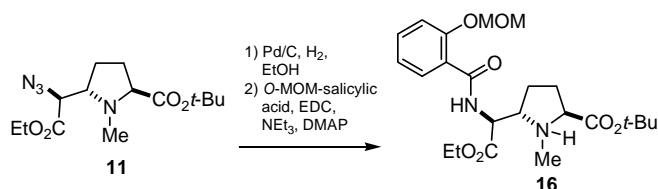

**(2S,5S,1'S)-5-[(2-Methoxymethoxybenzoylamino)-ethoxycarbonylmethyl]-1-**

**methylpyrrolidine-2-carboxylic acid *tert*-butyl ester (16):** Amide **16** was prepared from **11** (700 mg, 2.23 mmol) following the procedure described for the synthesis of **12**, and using 2-methoxymethoxybenzoic acid in place of 2-benzyloxybenzoic acid. The crude amide was purified by chromatography over silica gel (35% EtOAc/hexane eluant) to give **16** as a white solid (850 mg, 84% from **11**). <sup>1</sup>H NMR (300 MHz, CDCl<sub>3</sub>) δ 8.47 (d, J = 5.3 Hz, 1H), 8.19 (dd, J = 7.9, 1.8 Hz, 1H), 7.43 (ddd, J = 8.5, 7.3, 1.8 Hz, 1H), 7.13 (m, 2H), 5.31 (m, 2H), 4.79 (dq, J = 7.0, 1.5 Hz, 2H), 3.65 (d, J = 6.7 Hz, 1H), 3.58 (m, 1H), 3.54 (s, 3H), 2.50 (s, 3H), 2.19-1.80 (m, 4H), 1.48 (s, 9H), 1.29 (t, J = 7.0 Hz, 3H); <sup>13</sup>C NMR (75 MHz, CDCl<sub>3</sub>) δ 173.2, 171.2, 165.3, 155.4, 132.8, 132.3, 122.3, 122.0, 114.6, 95.0, 81.1, 67.6, 62.9, 61.1, 56.6, 54.0, 35.0, 28.2, 27.6, 25.4, 14.2; mp = 79-81 °C; HRMS (ESI-TOF) (m/z) [MH]<sup>+</sup> calcd for C<sub>23</sub>H<sub>34</sub>N<sub>2</sub>O<sub>7</sub> 451.2444, found 451.2431.

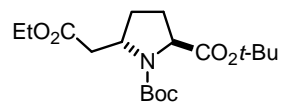

300 Mhz  $^1\text{H}$  NMR,  $\text{CDCl}_3$

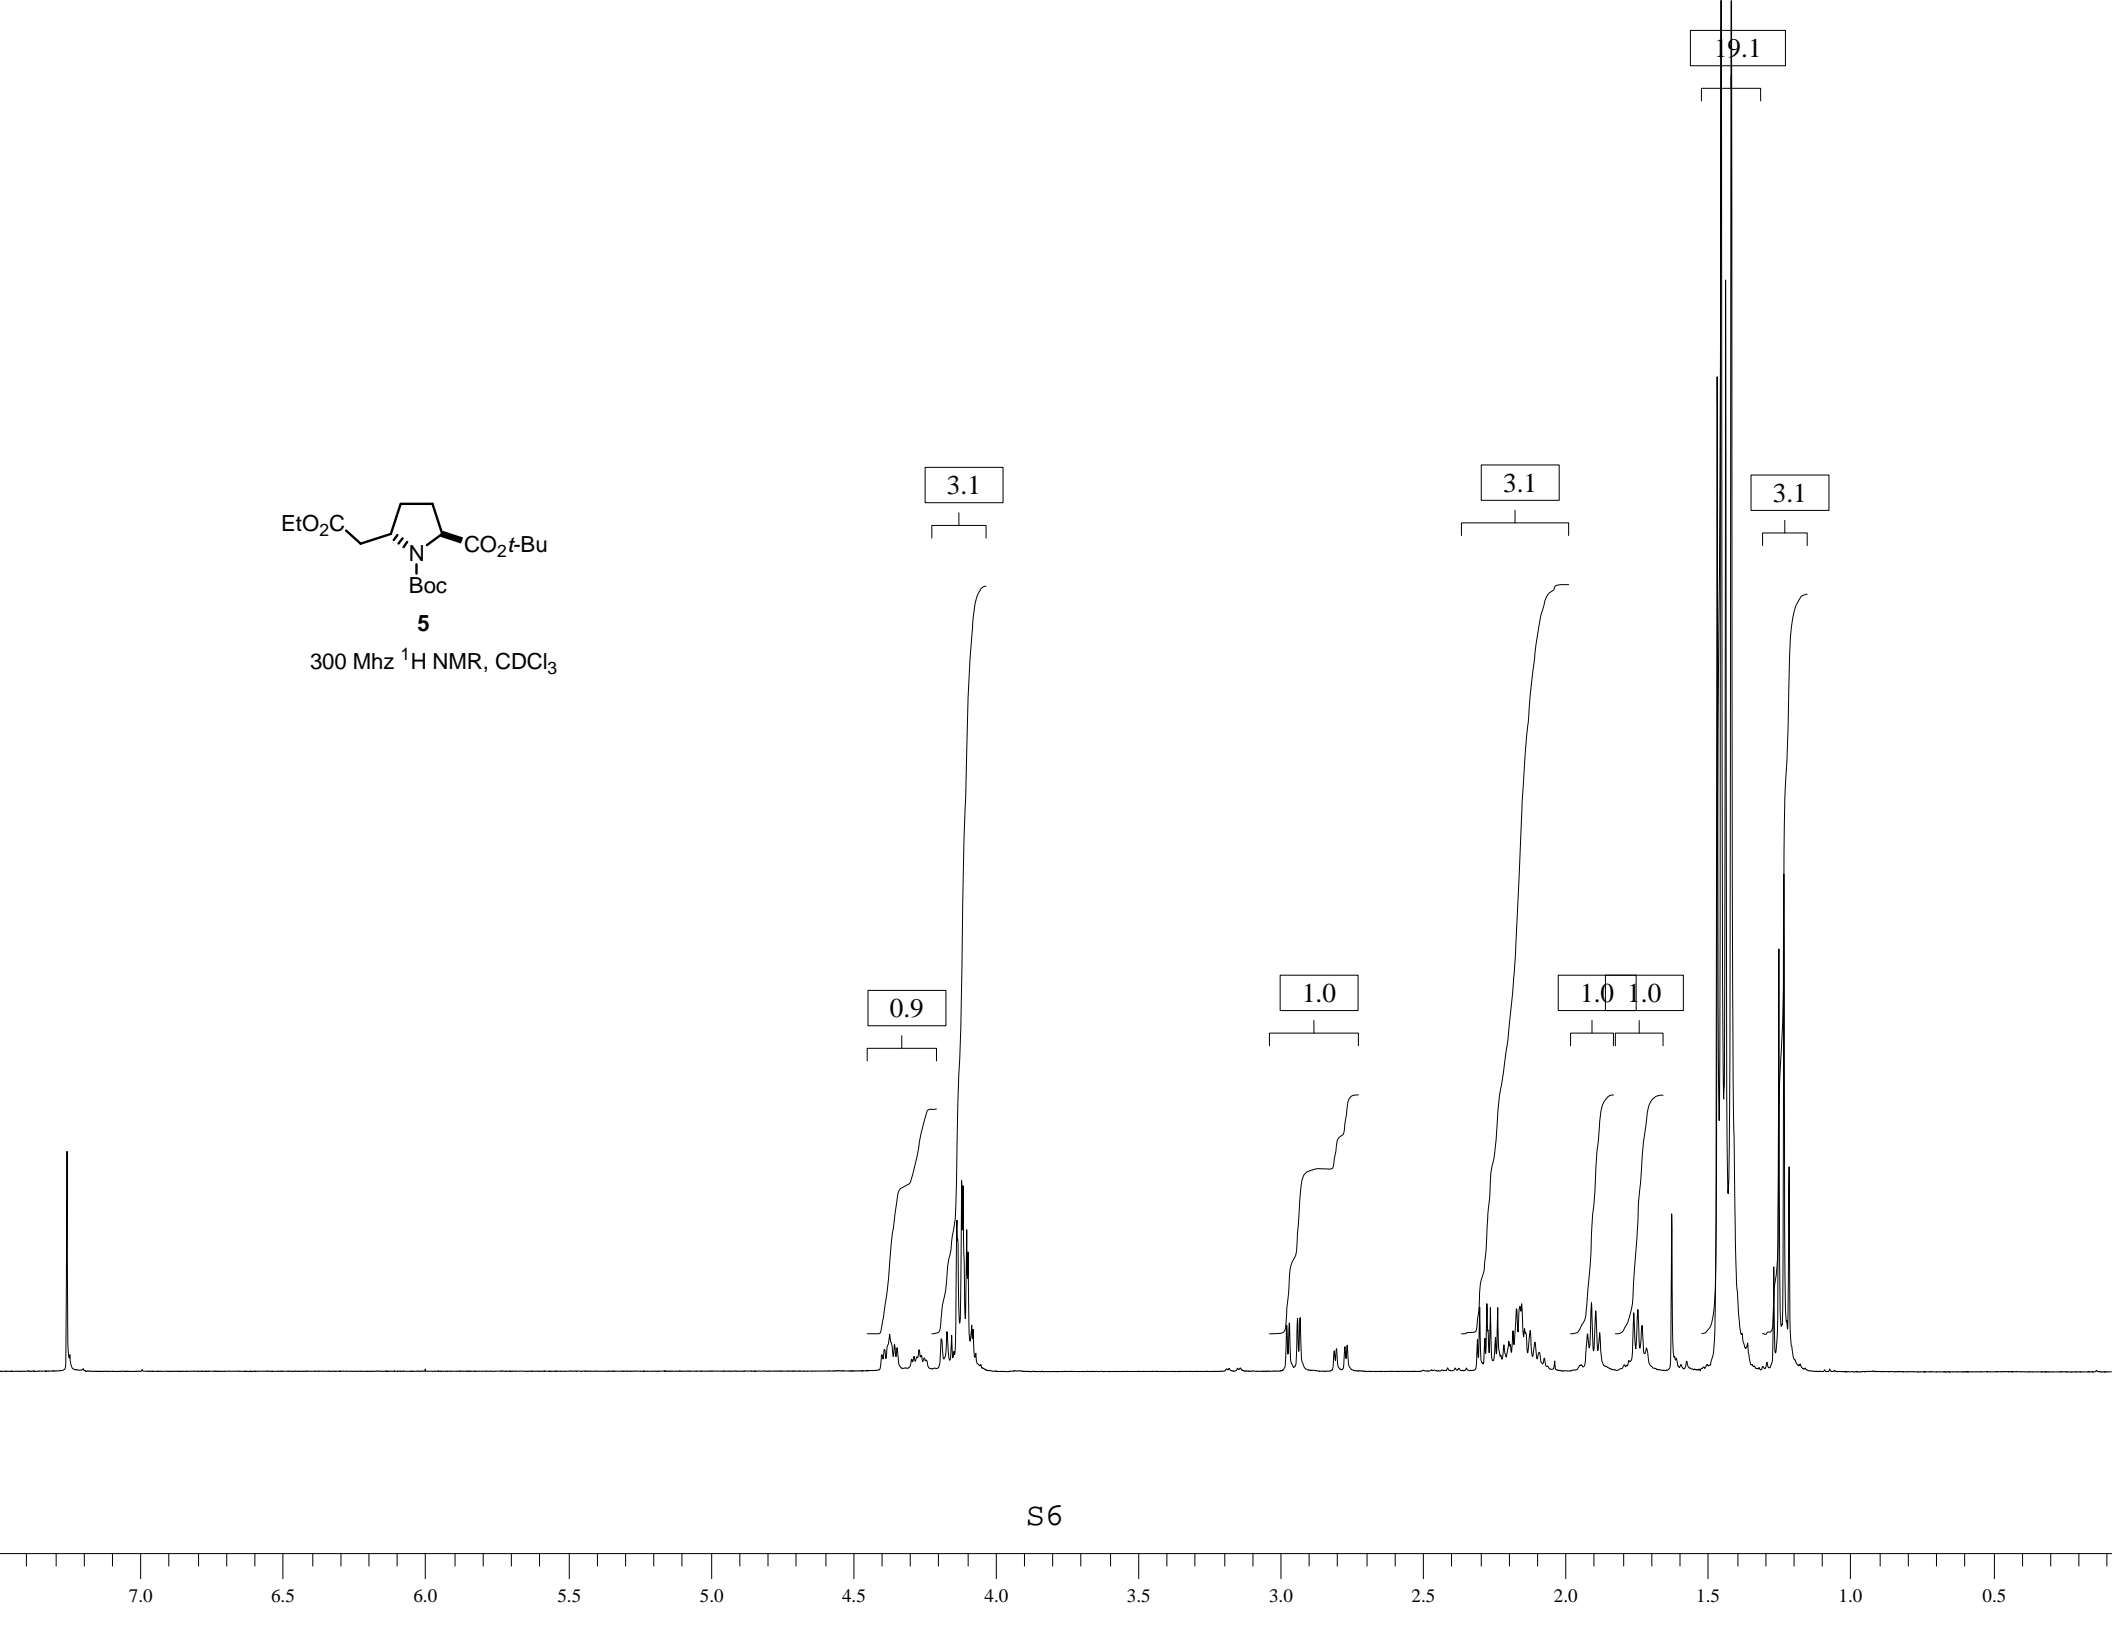

171.916  
171.396

153.955  
153.643

80.981  
80.061  
79.911

60.443  
60.297  
54.715  
54.686

39.428  
38.447

28.360  
28.270  
27.975  
27.915

14.186

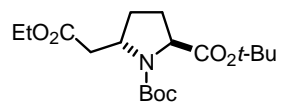

**5**

75 Mhz <sup>13</sup>C NMR, CDCl<sub>3</sub>

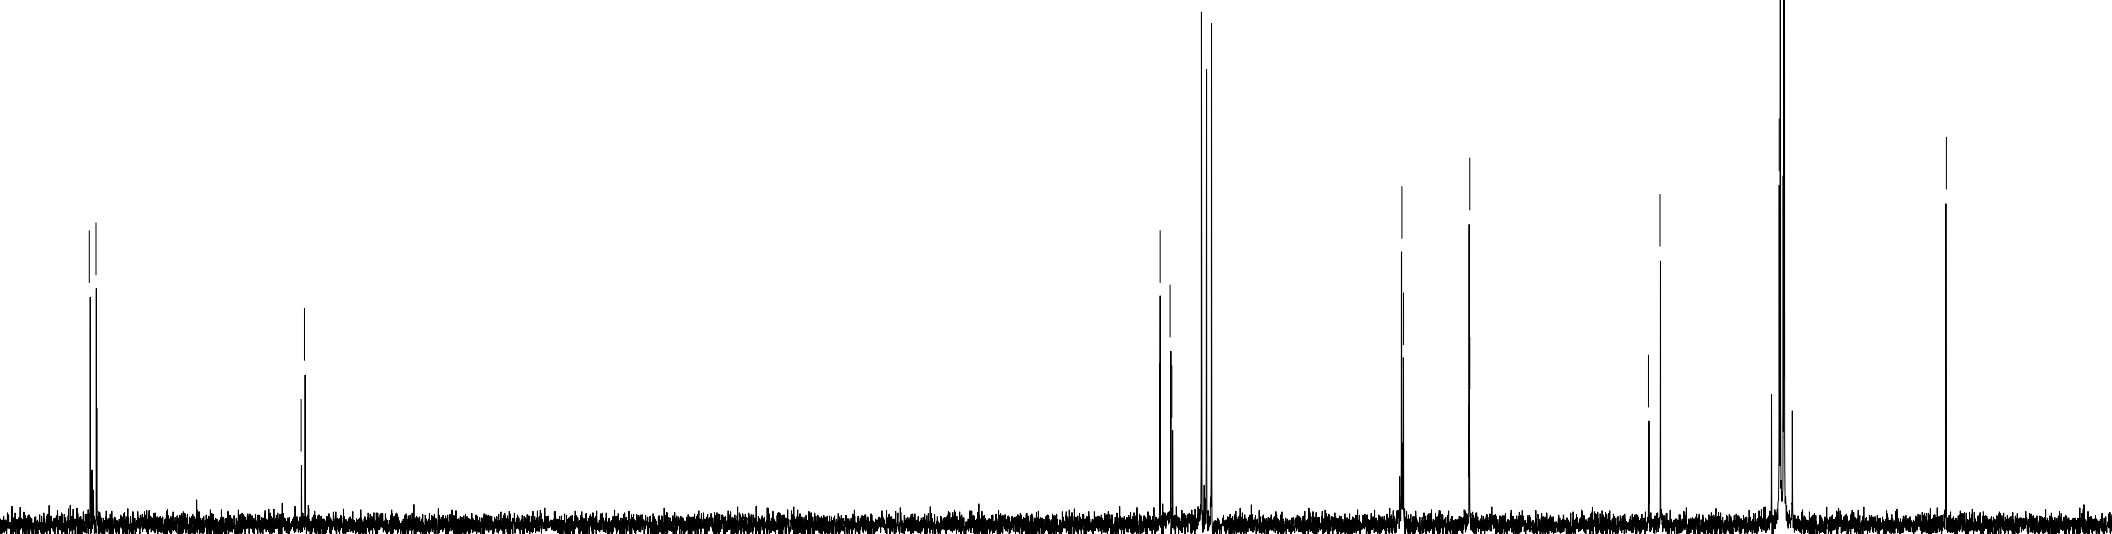

170 160 150 140 130 120 110 100 90 80 70 60 50 40 30 20 10

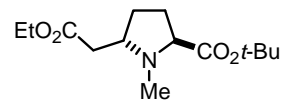

**10**

300 Mhz  $^1\text{H}$  NMR,  $\text{CDCl}_3$

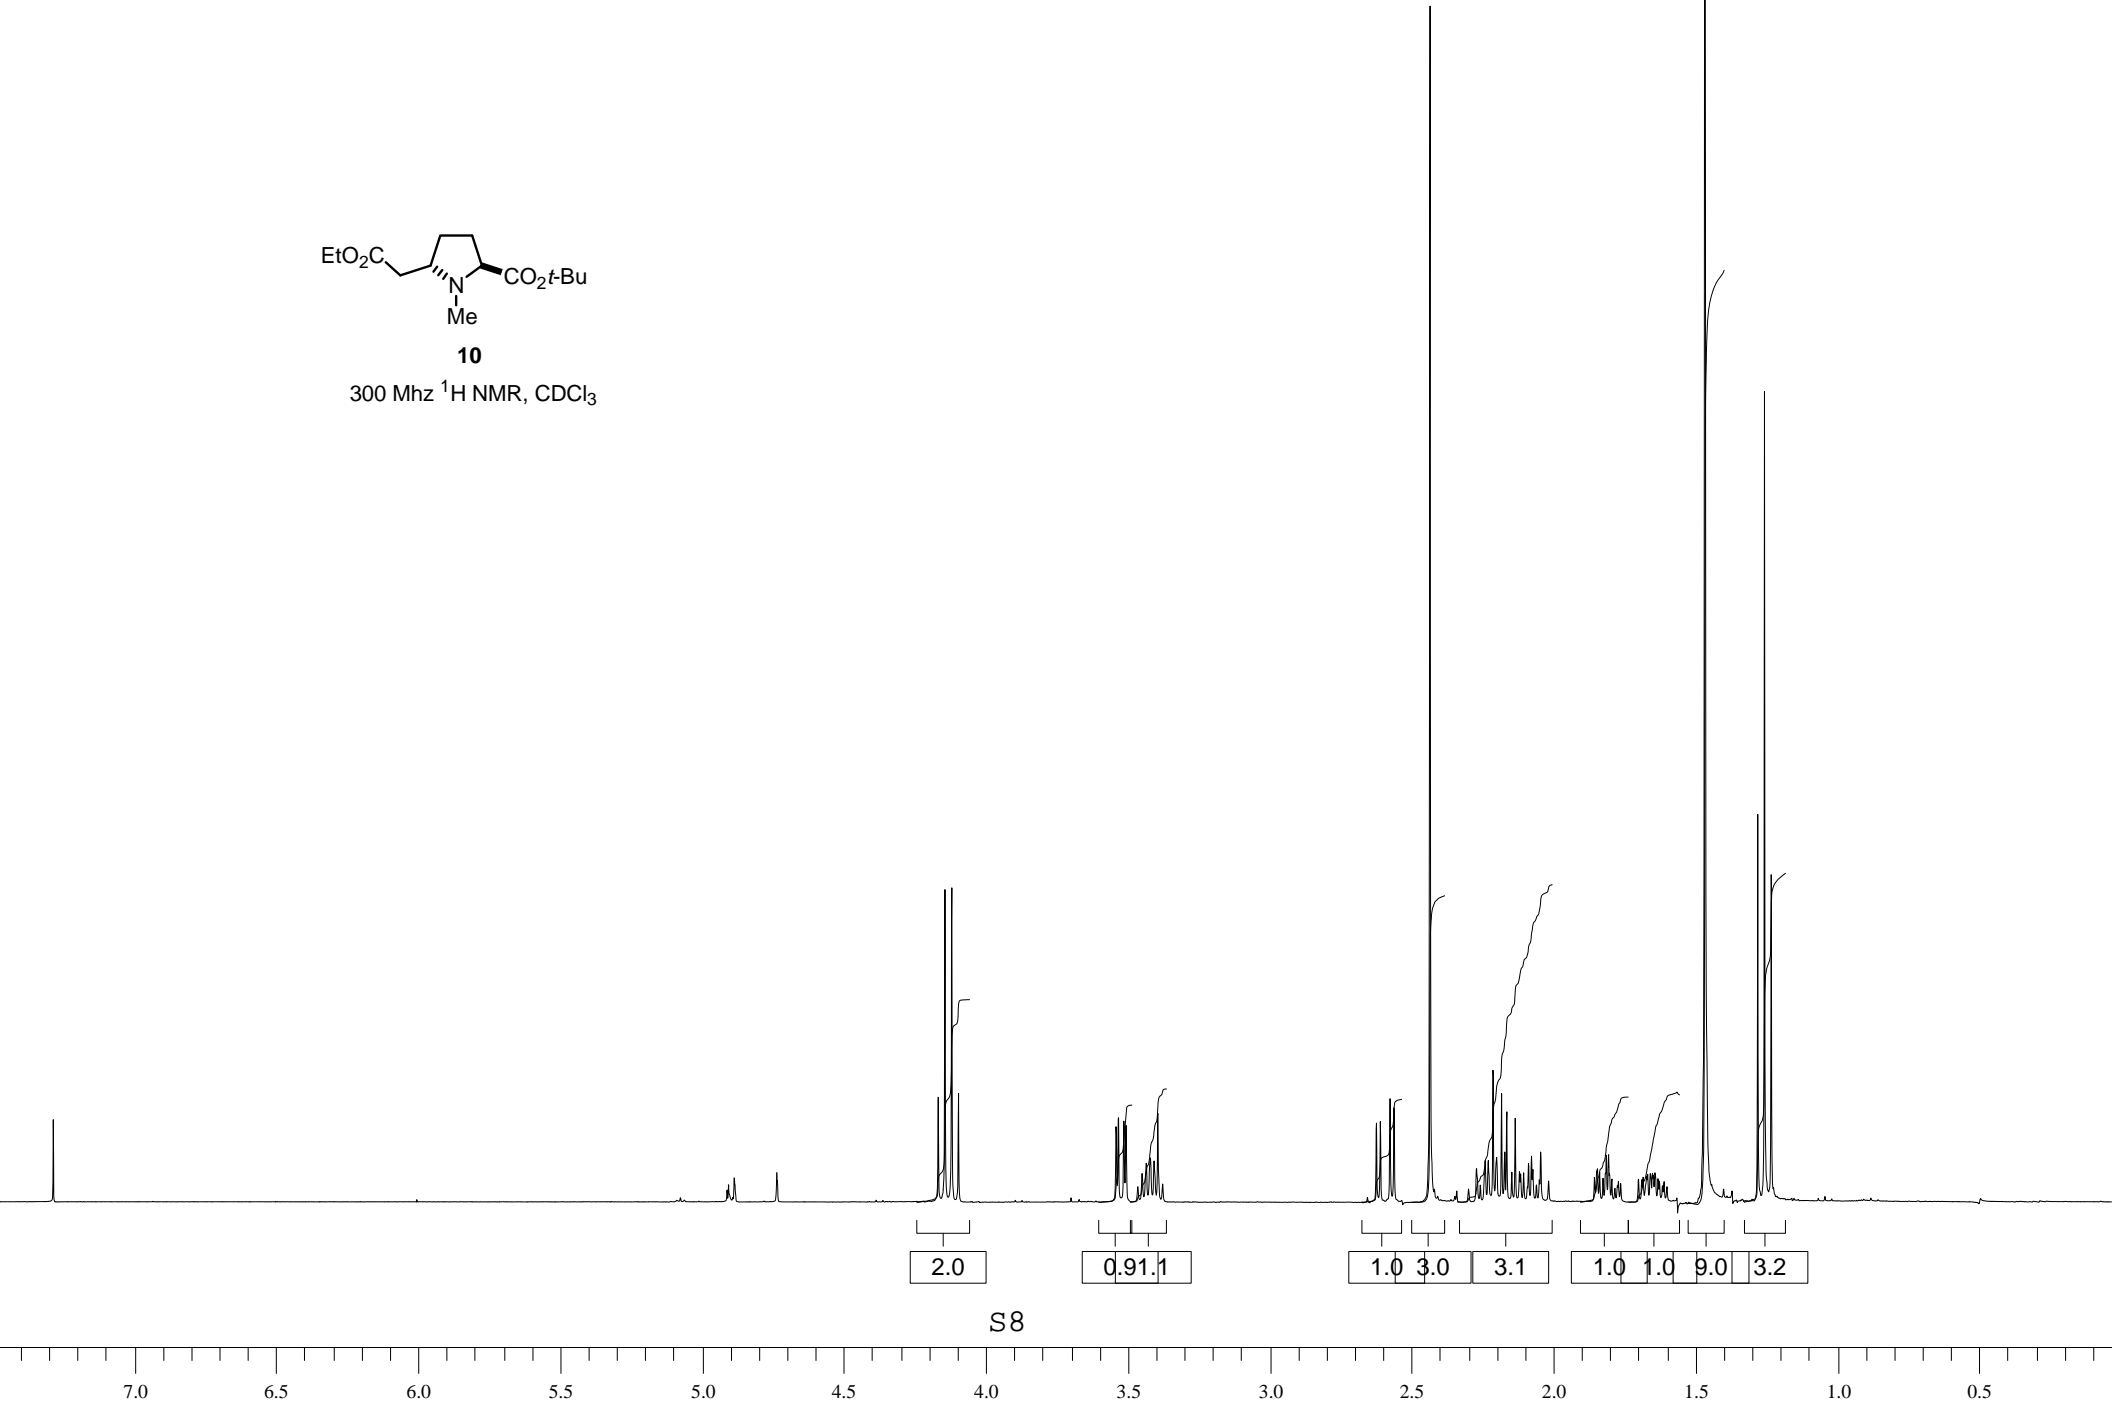



173.342  
172.228

80.729

66.987

60.228

59.693

38.805

35.269

29.921

28.183

27.336

14.218

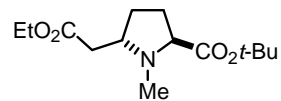

**10**

75 Mhz <sup>13</sup>C NMR, CDCl<sub>3</sub>

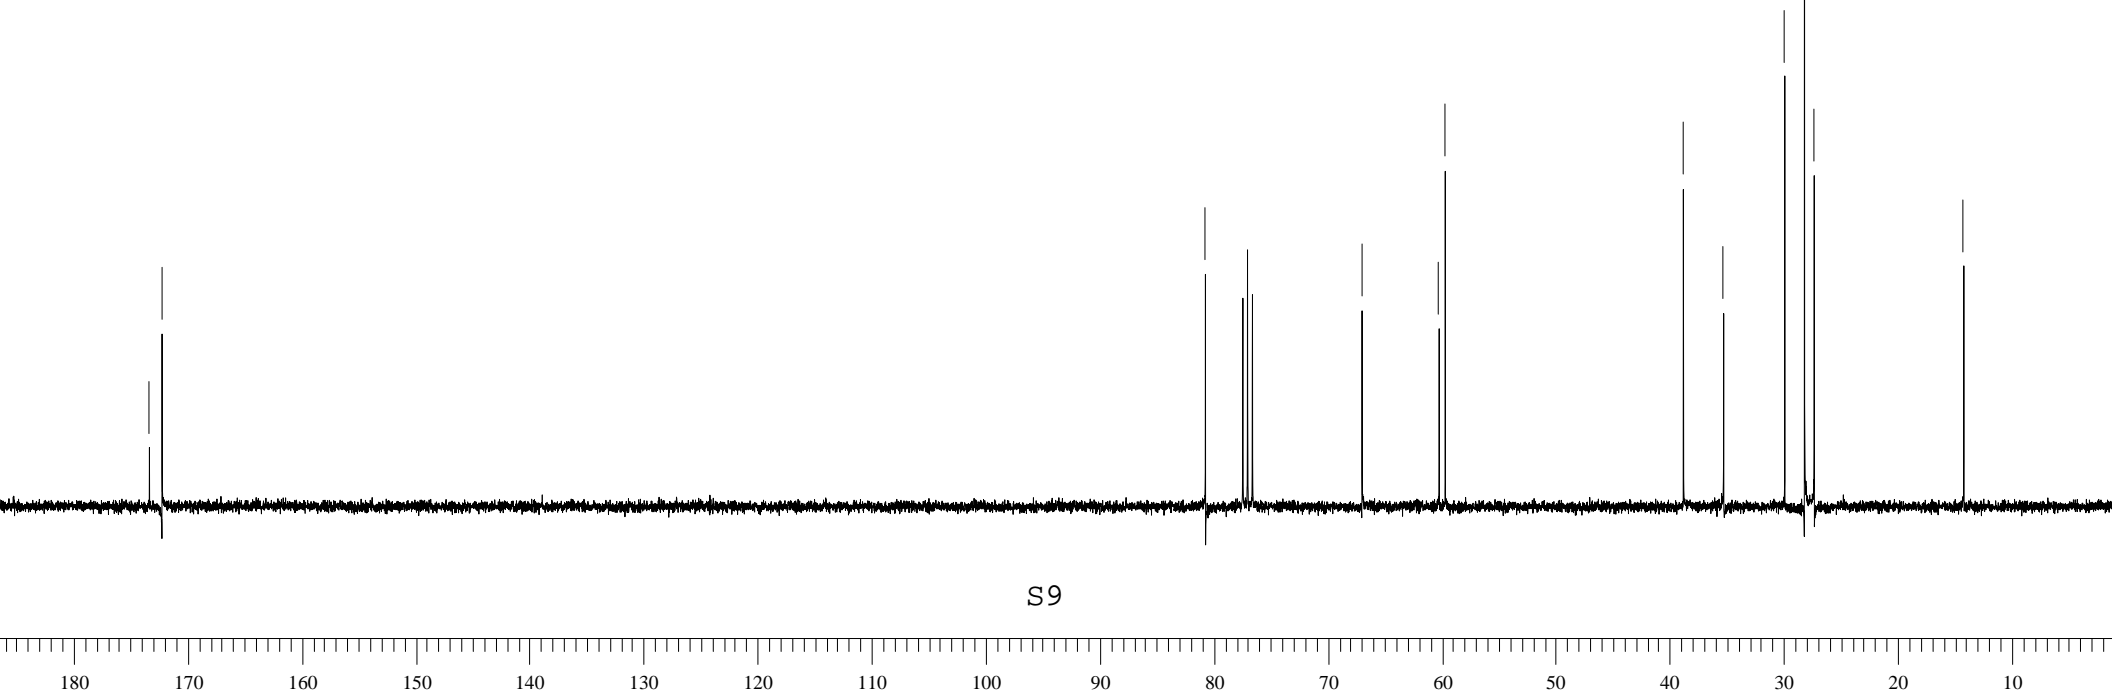

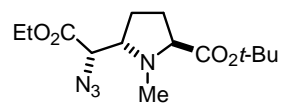

11

300 Mhz <sup>1</sup>H NMR, CDCl<sub>3</sub>

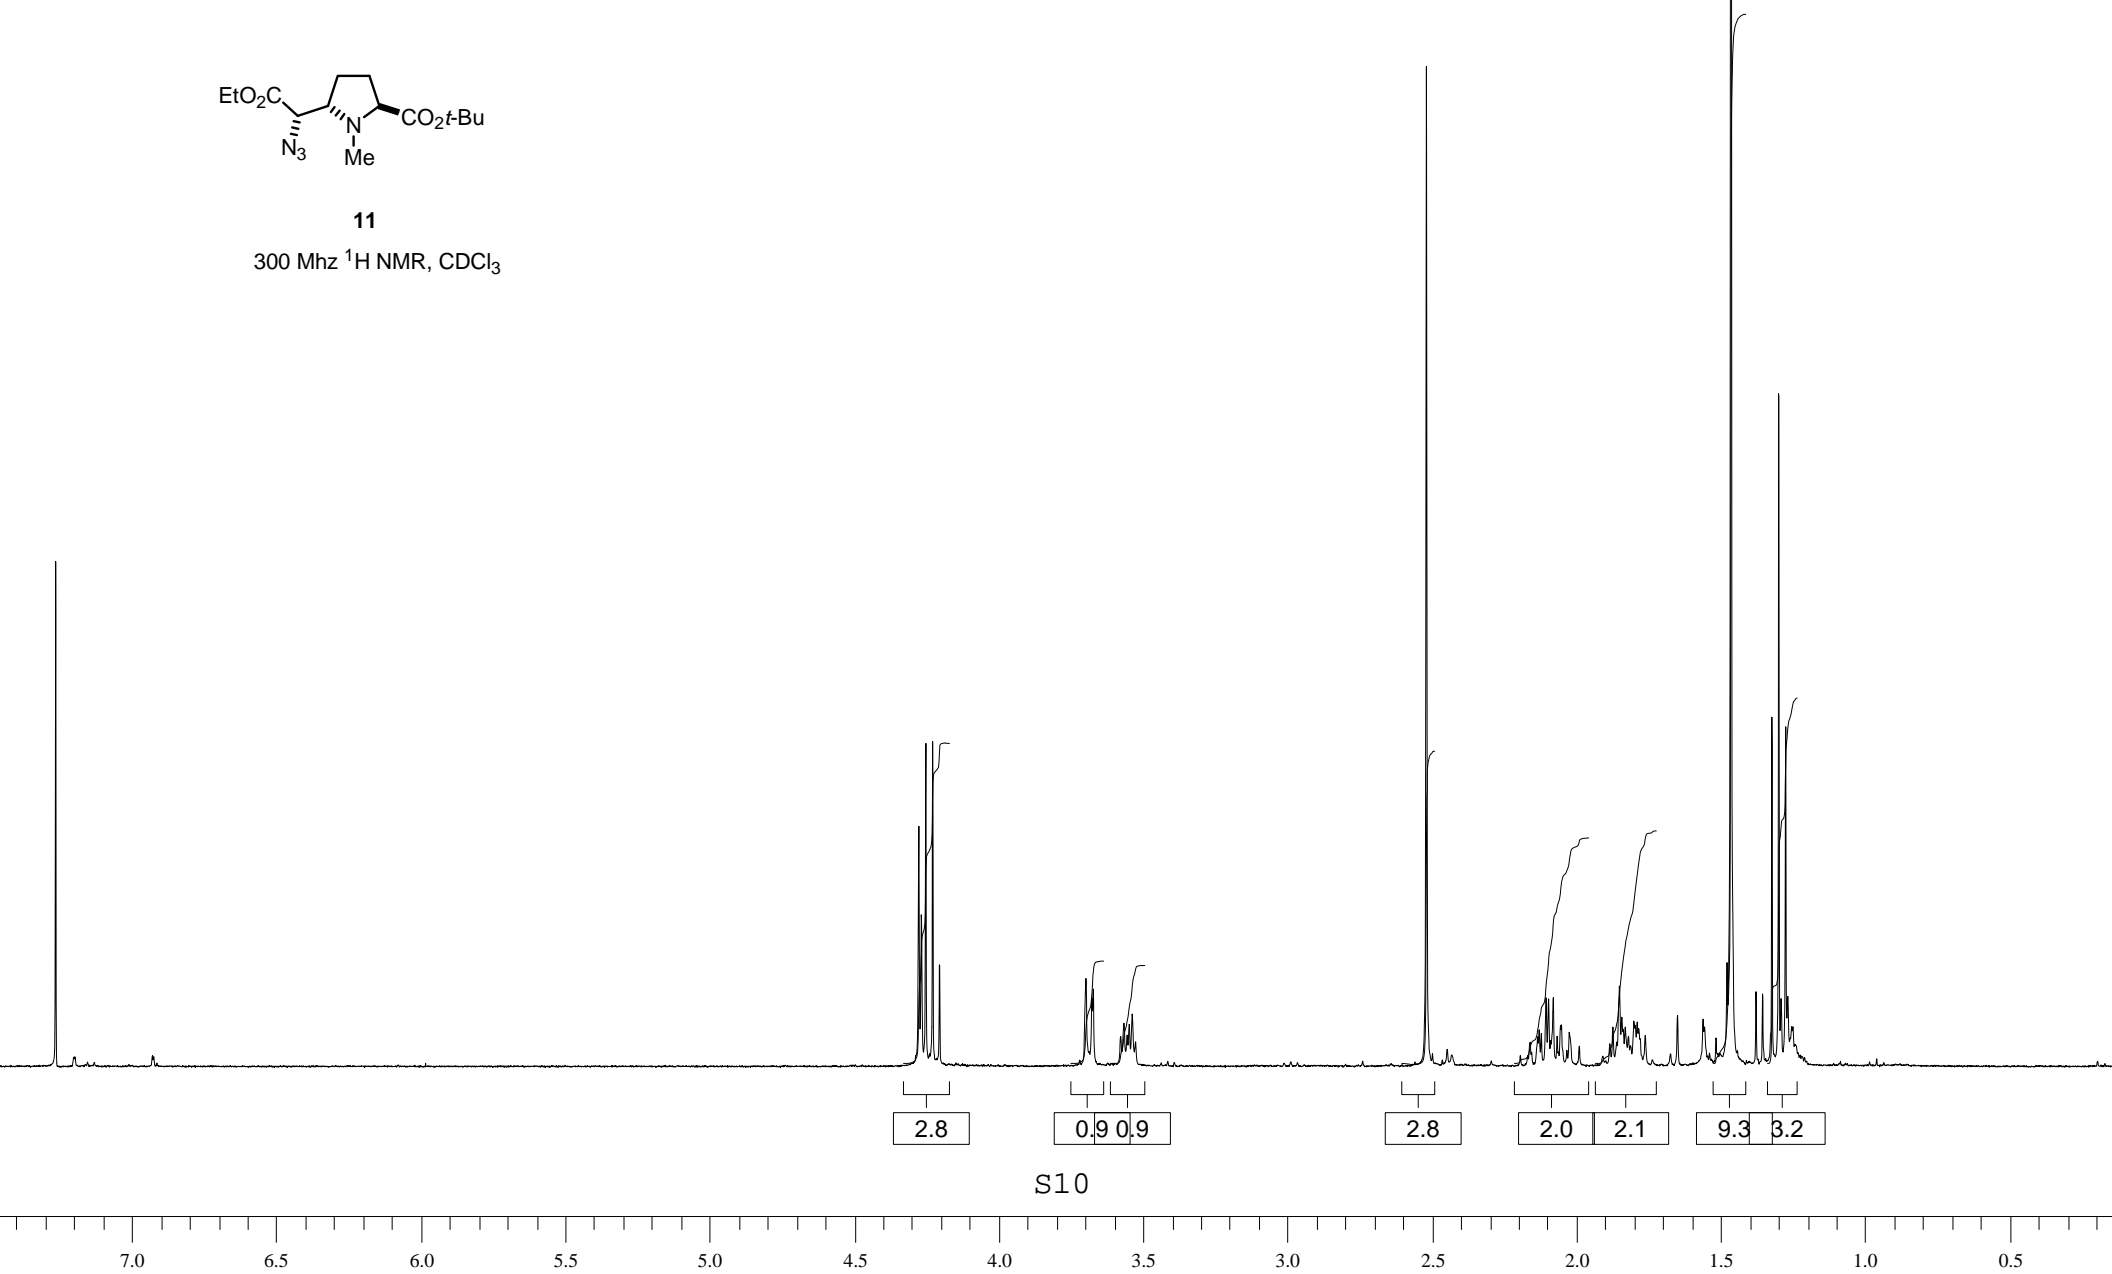

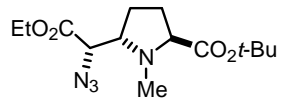

**11**

75 MHz <sup>13</sup>C NMR, CDCl<sub>3</sub>

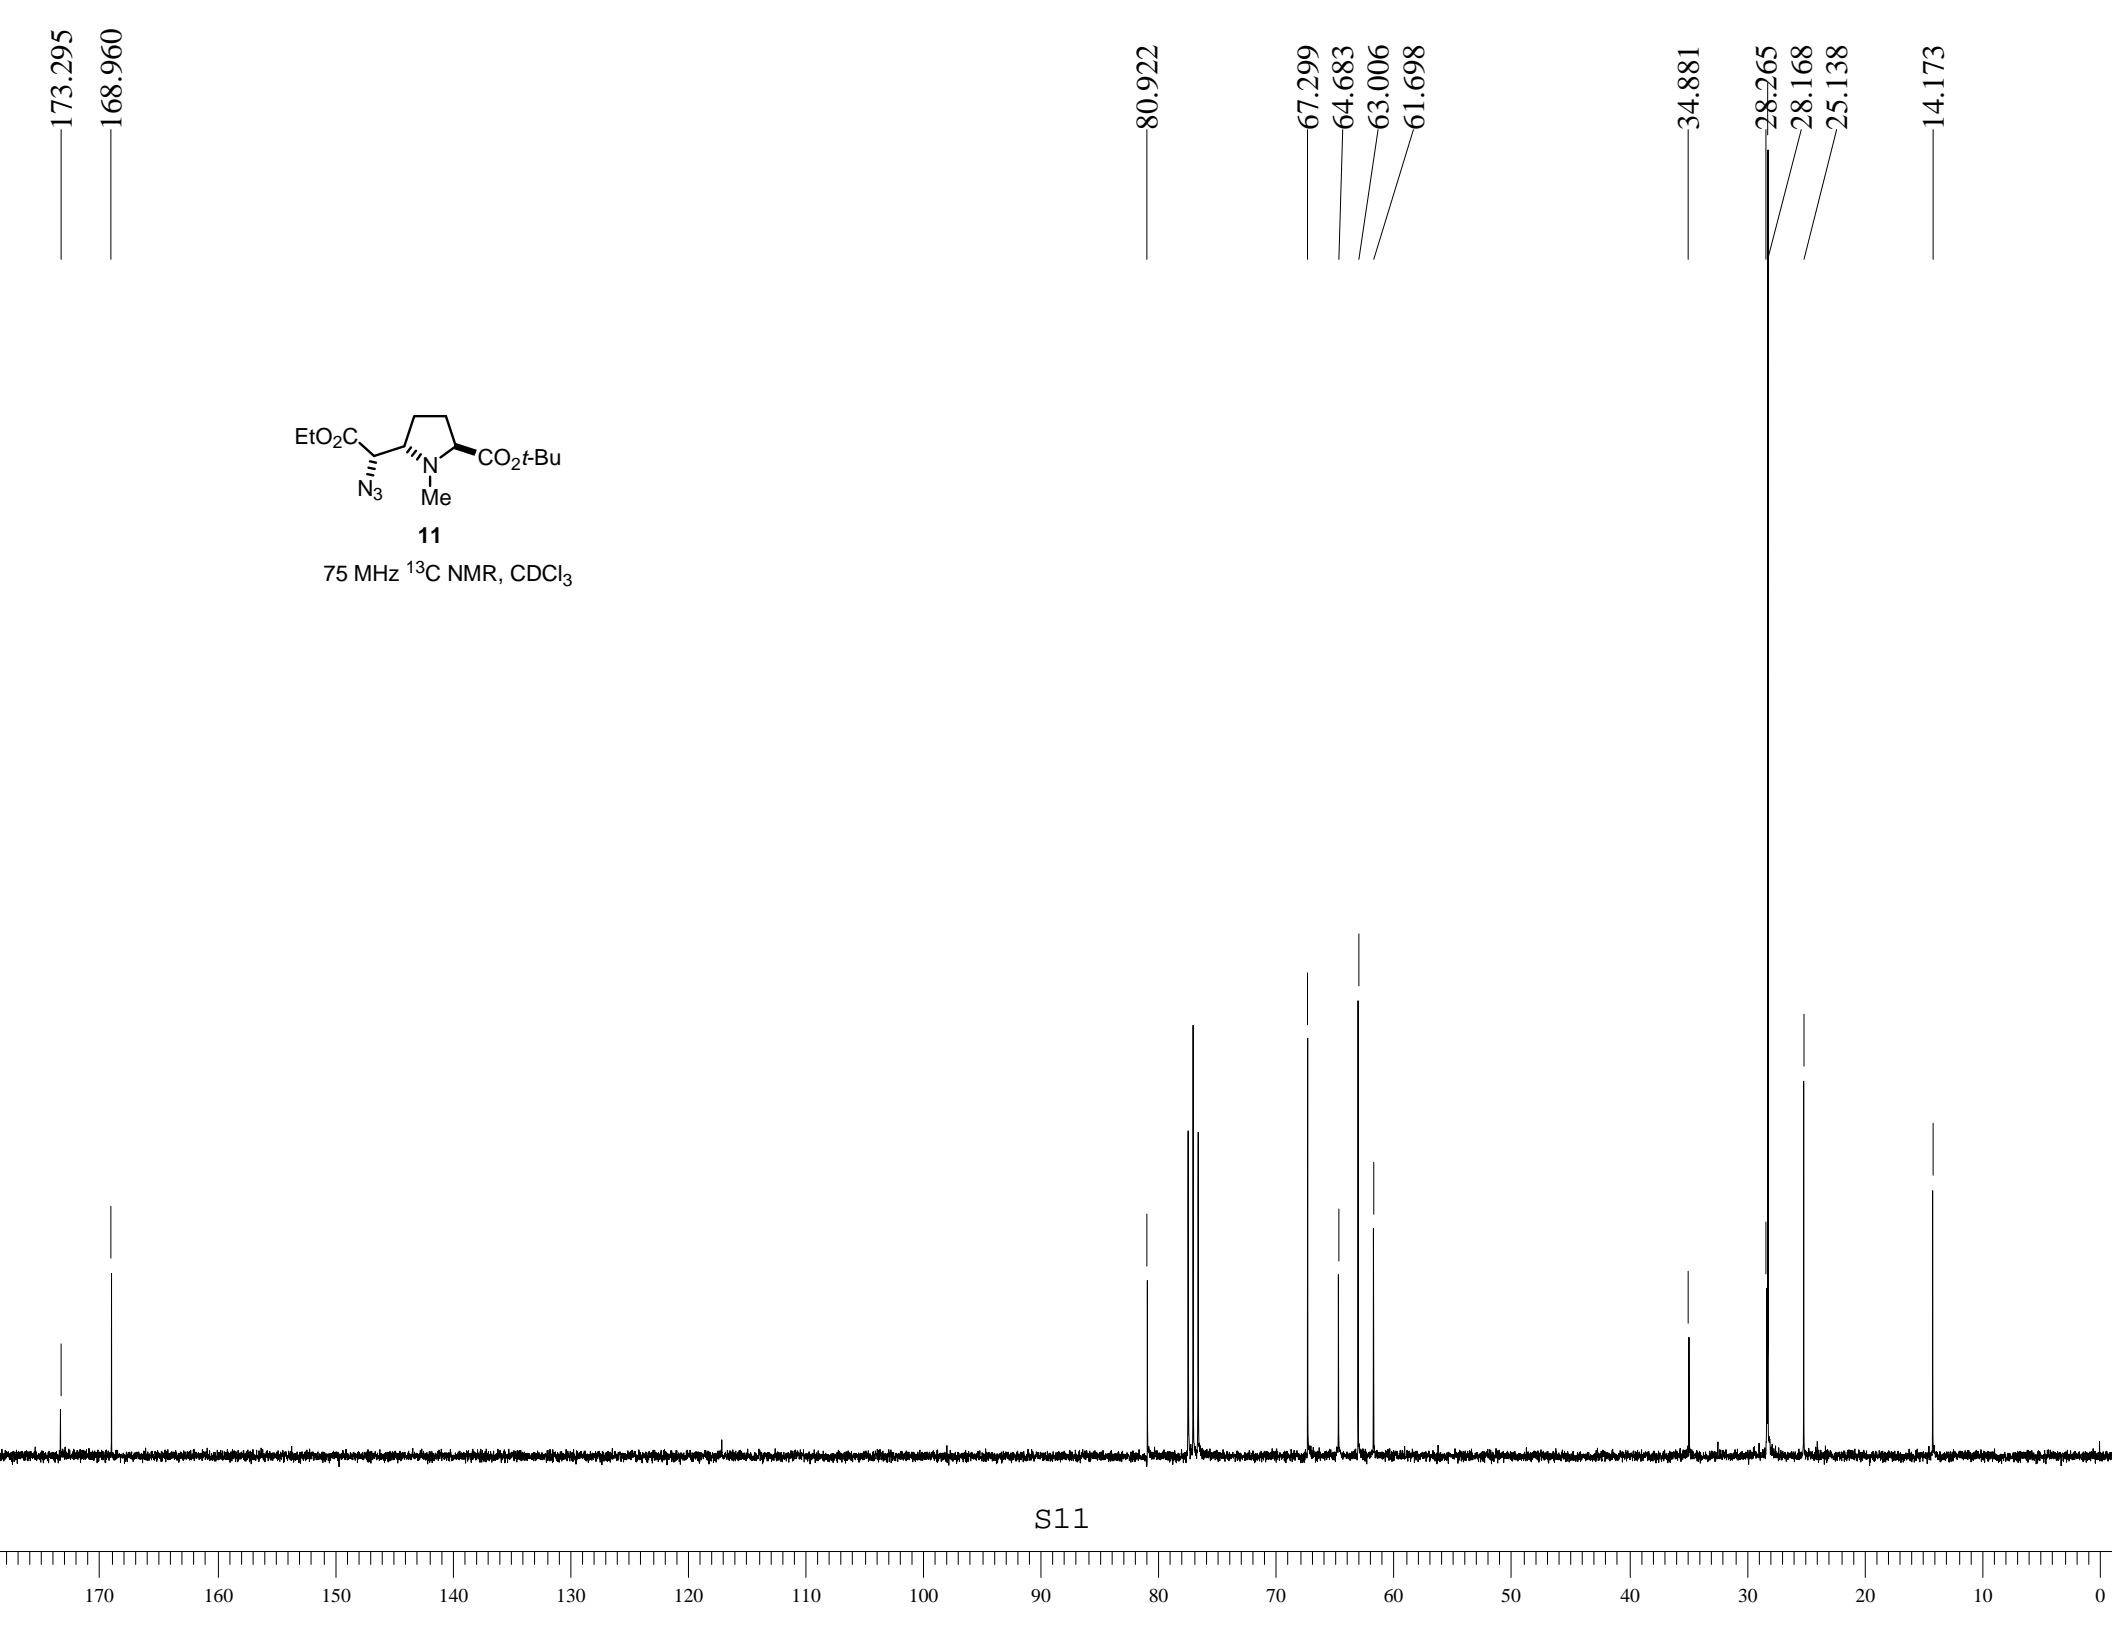



173.446  
171.203  
165.424  
156.985  
135.563  
132.815  
132.576  
128.860  
128.670  
128.209  
121.613  
121.434  
112.665

80.774  
71.221  
67.224  
63.004  
60.996  
53.595

34.824  
28.183  
27.514  
25.018  
14.248

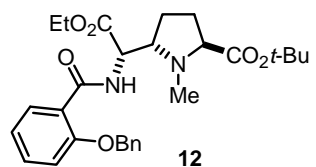

75 Mhz  $^{13}\text{C}$  NMR,  $\text{CDCl}_3$

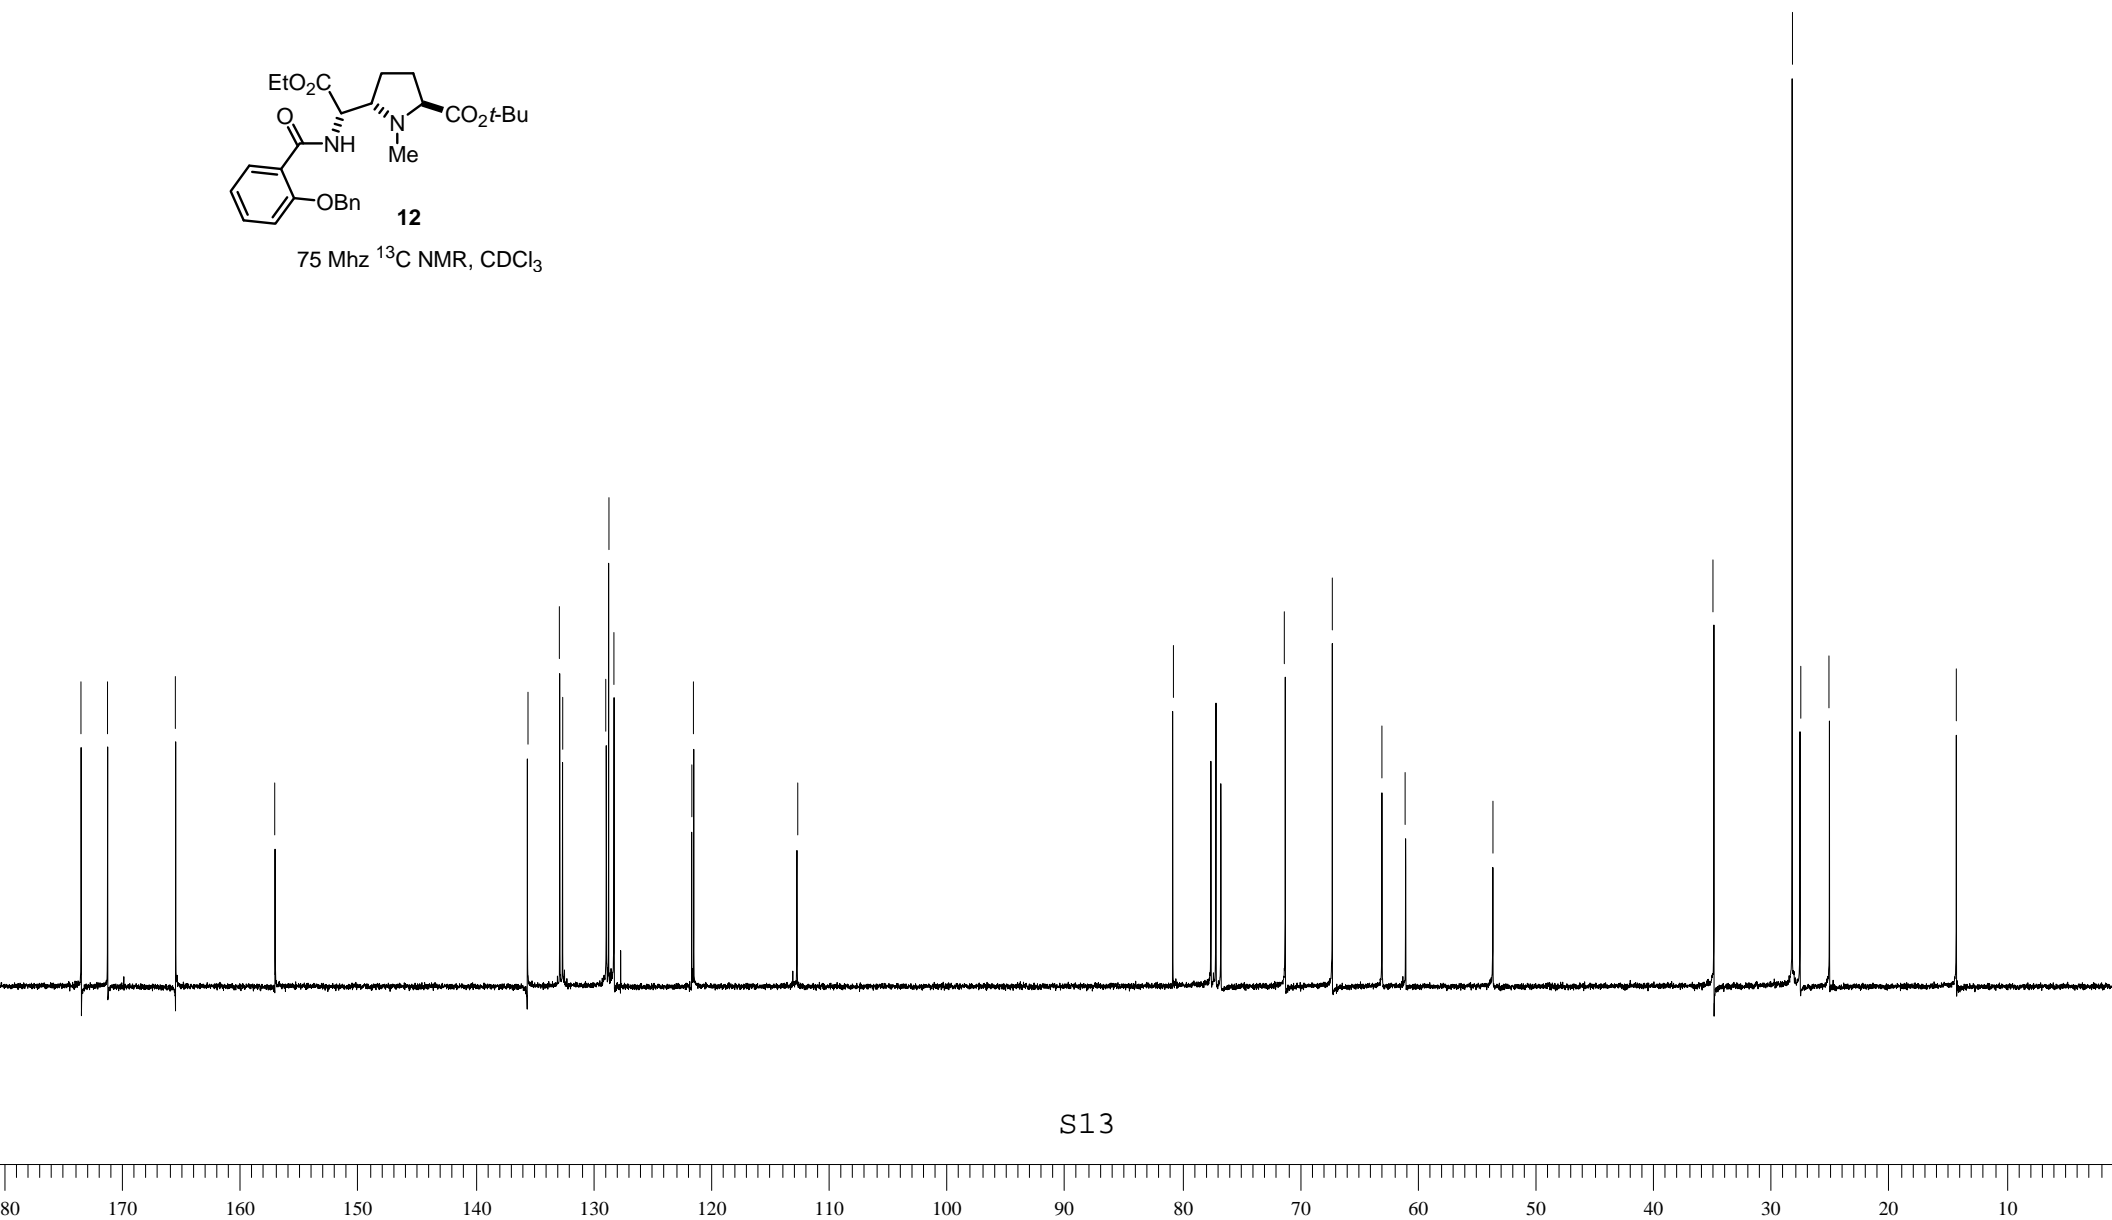

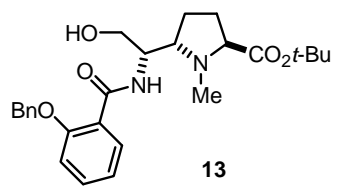

300 MHz <sup>1</sup>H NMR, CDCl<sub>3</sub>

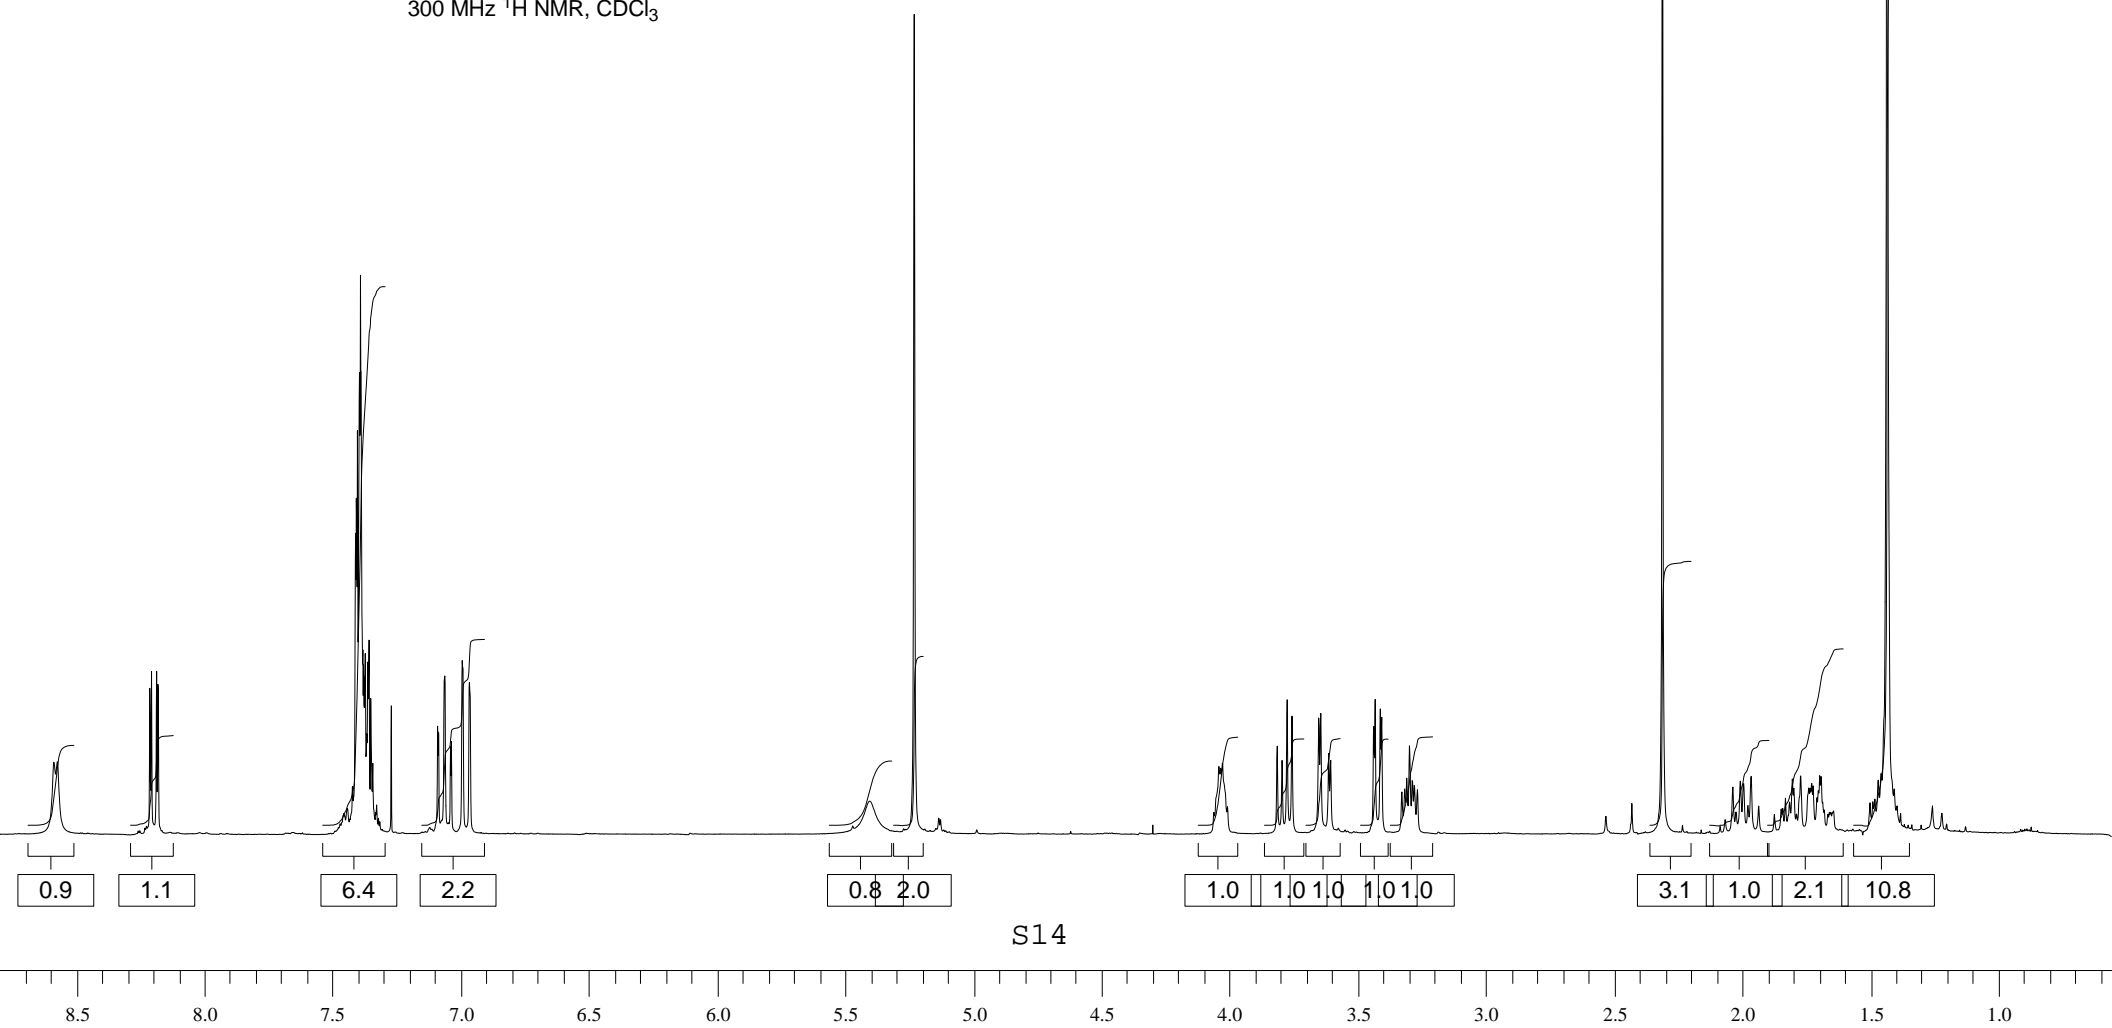

172.956  
167.013  
156.644  
135.770  
132.829  
132.304  
128.877  
128.565  
127.494  
121.970  
121.464  
112.907

81.070  
70.954  
67.284  
65.279  
63.585  
54.641

35.373  
28.198  
27.634  
25.329

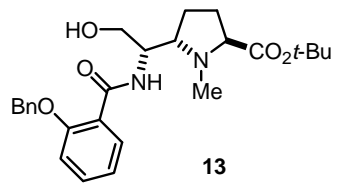

75 MHz  $^{13}\text{C}$  NMR,  $\text{CDCl}_3$

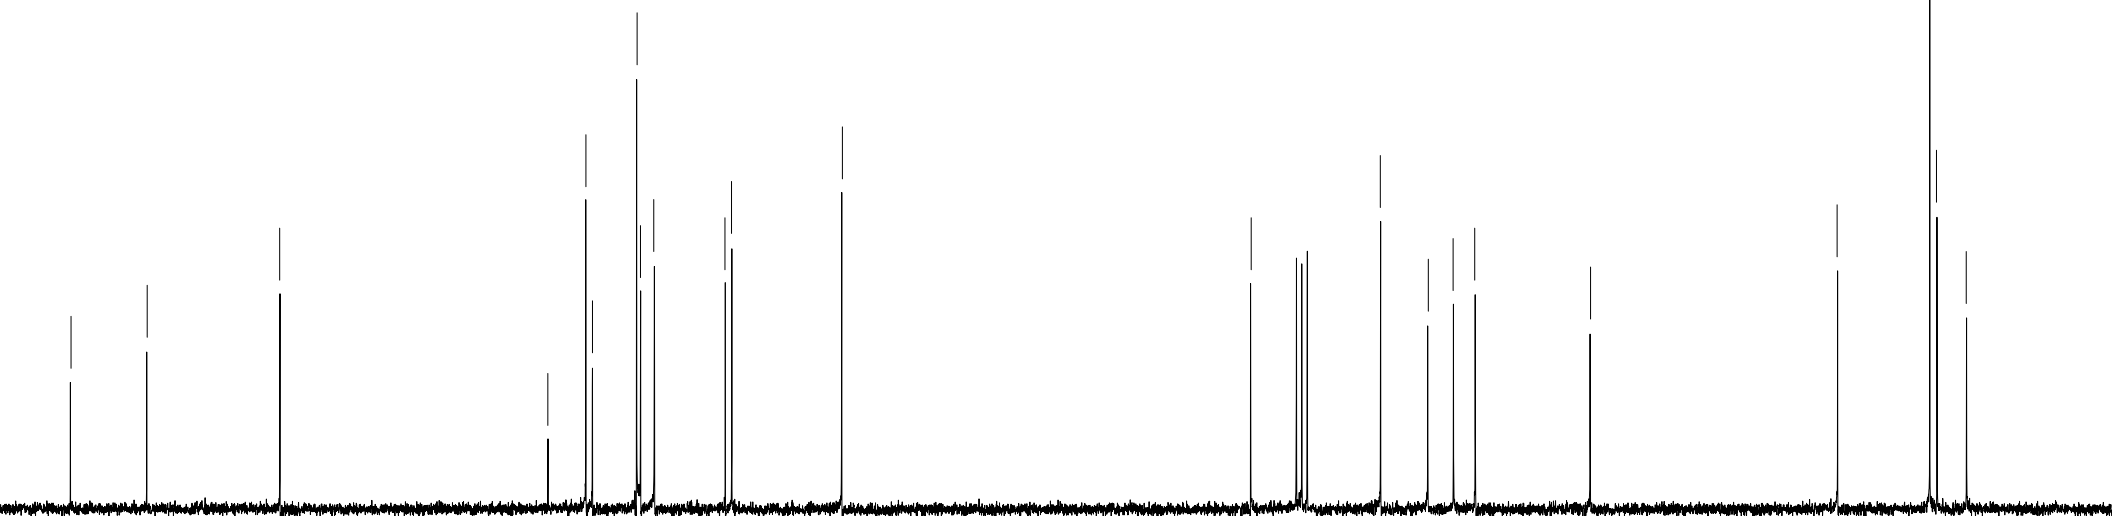

170 160 150 140 130 120 110 100 90 80 70 60 50 40 30 20

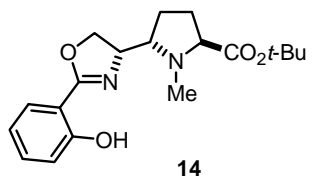

300 MHz  $^1\text{H}$  NMR,  $\text{CDCl}_3$

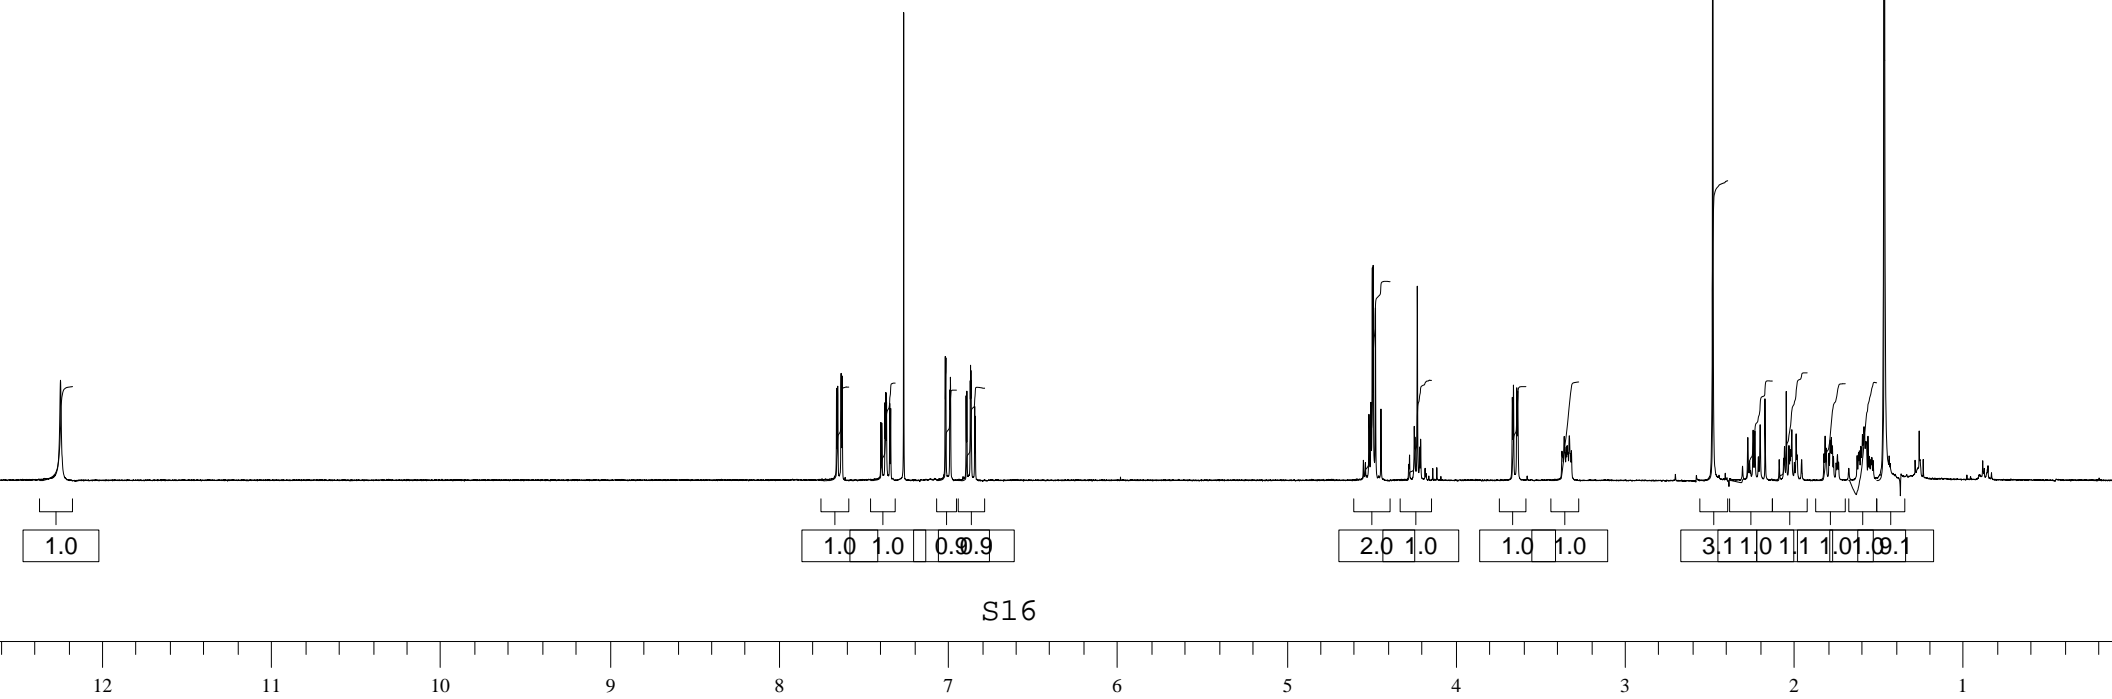



173.580  
165.735  
159.957

133.333  
128.031  
118.553  
116.725  
110.530

80.818

68.991  
68.681  
68.458  
65.396

36.710

28.207  
28.108  
26.742

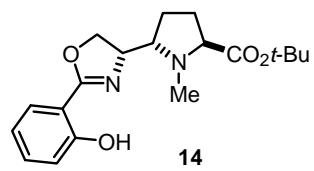

75 Mhz  $^{13}\text{C}$  NMR,  $\text{CDCl}_3$

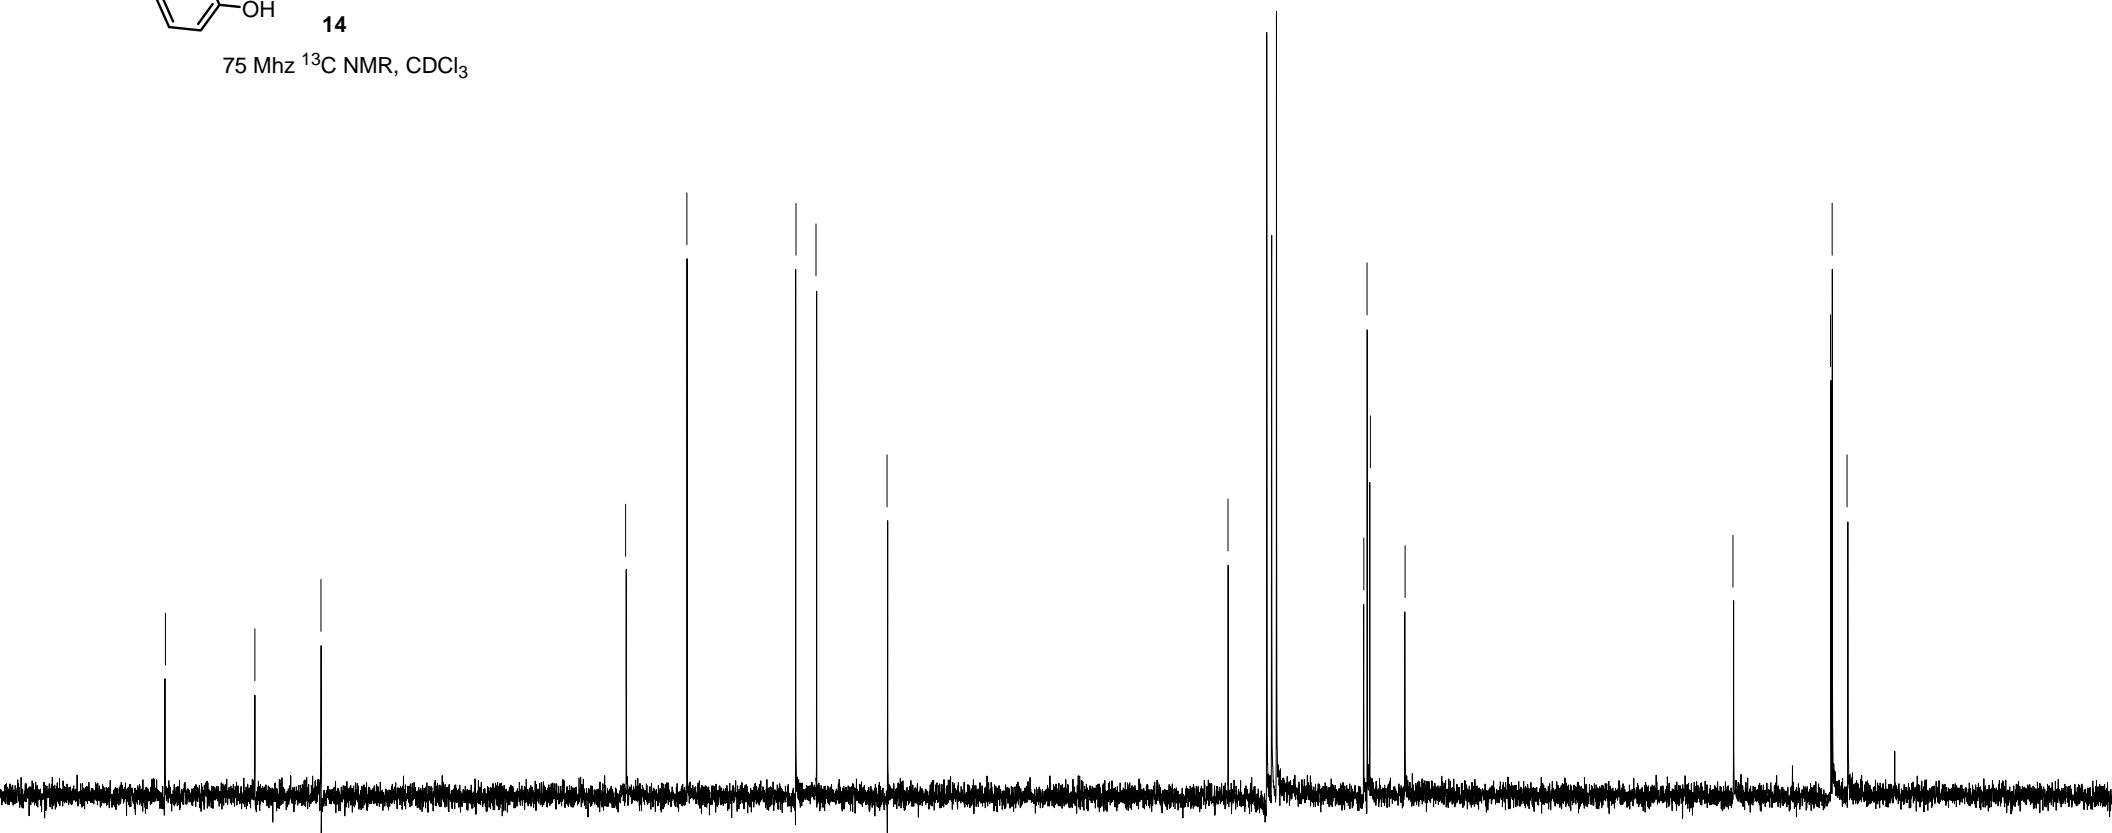

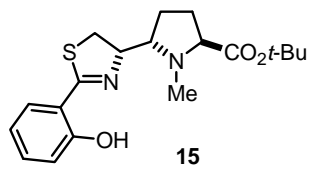

400 Mhz <sup>1</sup>H NMR, CDCl<sub>3</sub>

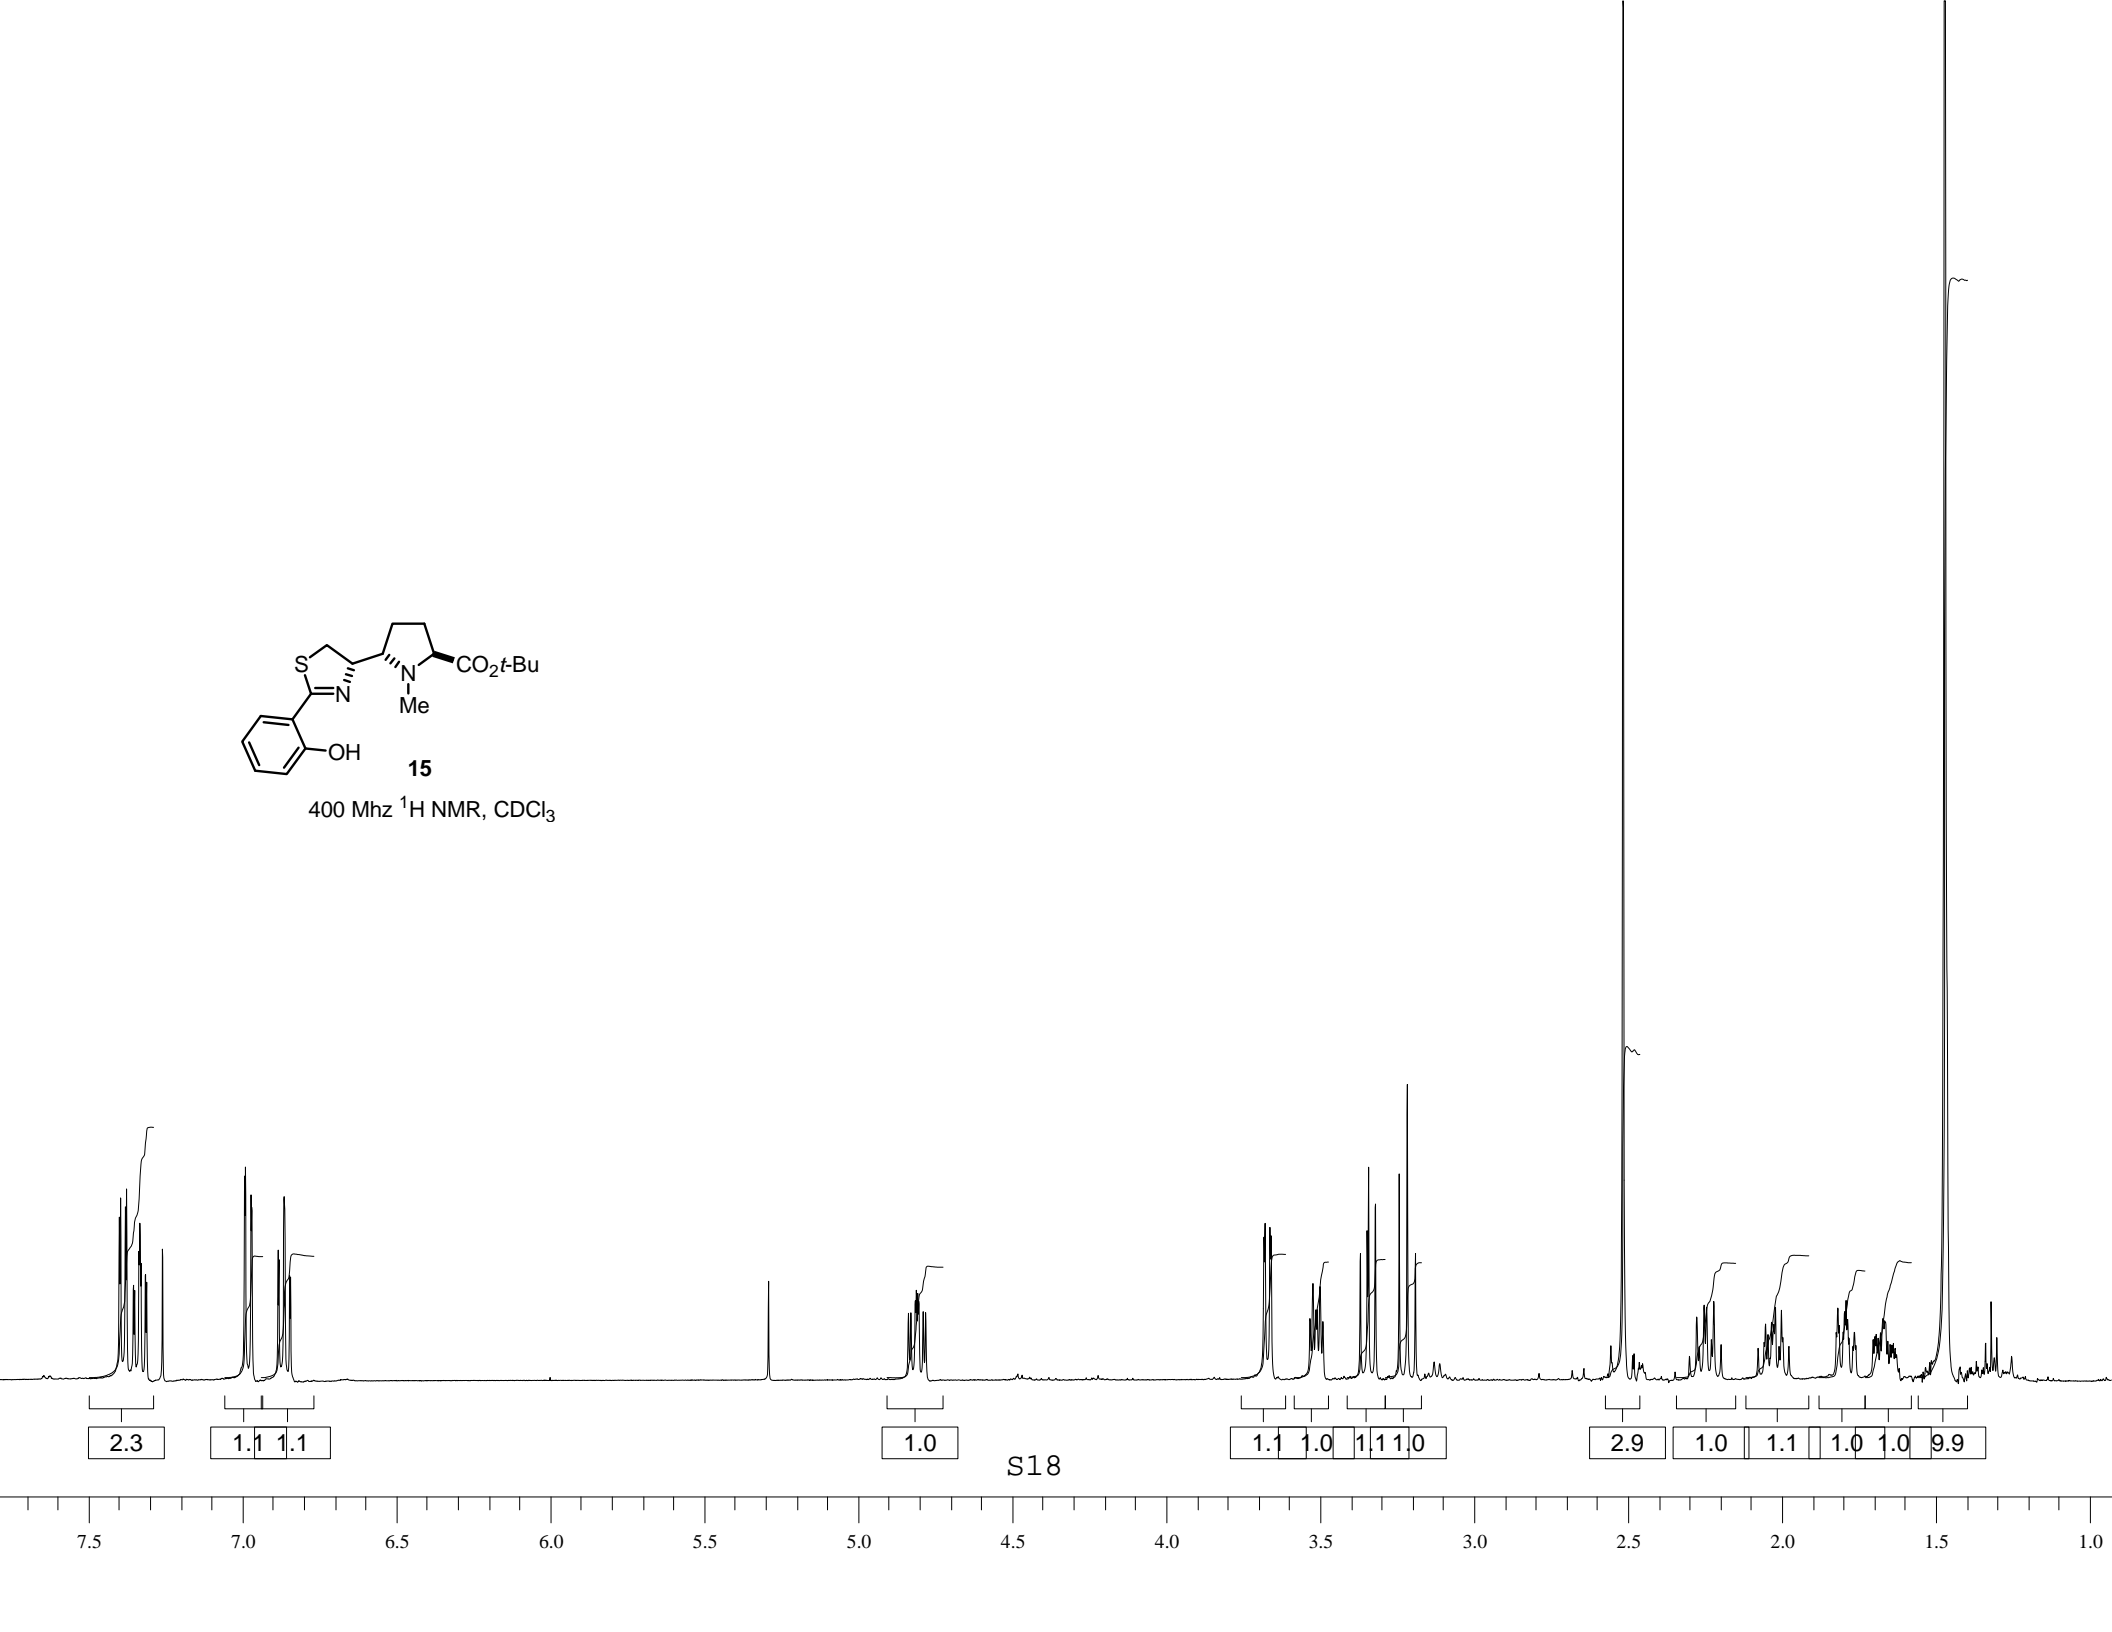

173.861  
171.537

159.392

133.042  
130.608

118.929  
117.226  
116.579

81.029  
79.569

68.609  
65.985

36.743  
33.005  
28.451  
28.352  
27.016

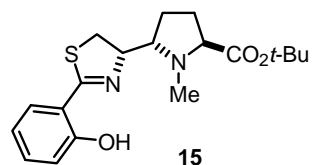

100 Mhz <sup>13</sup>C NMR, CDCl<sub>3</sub>

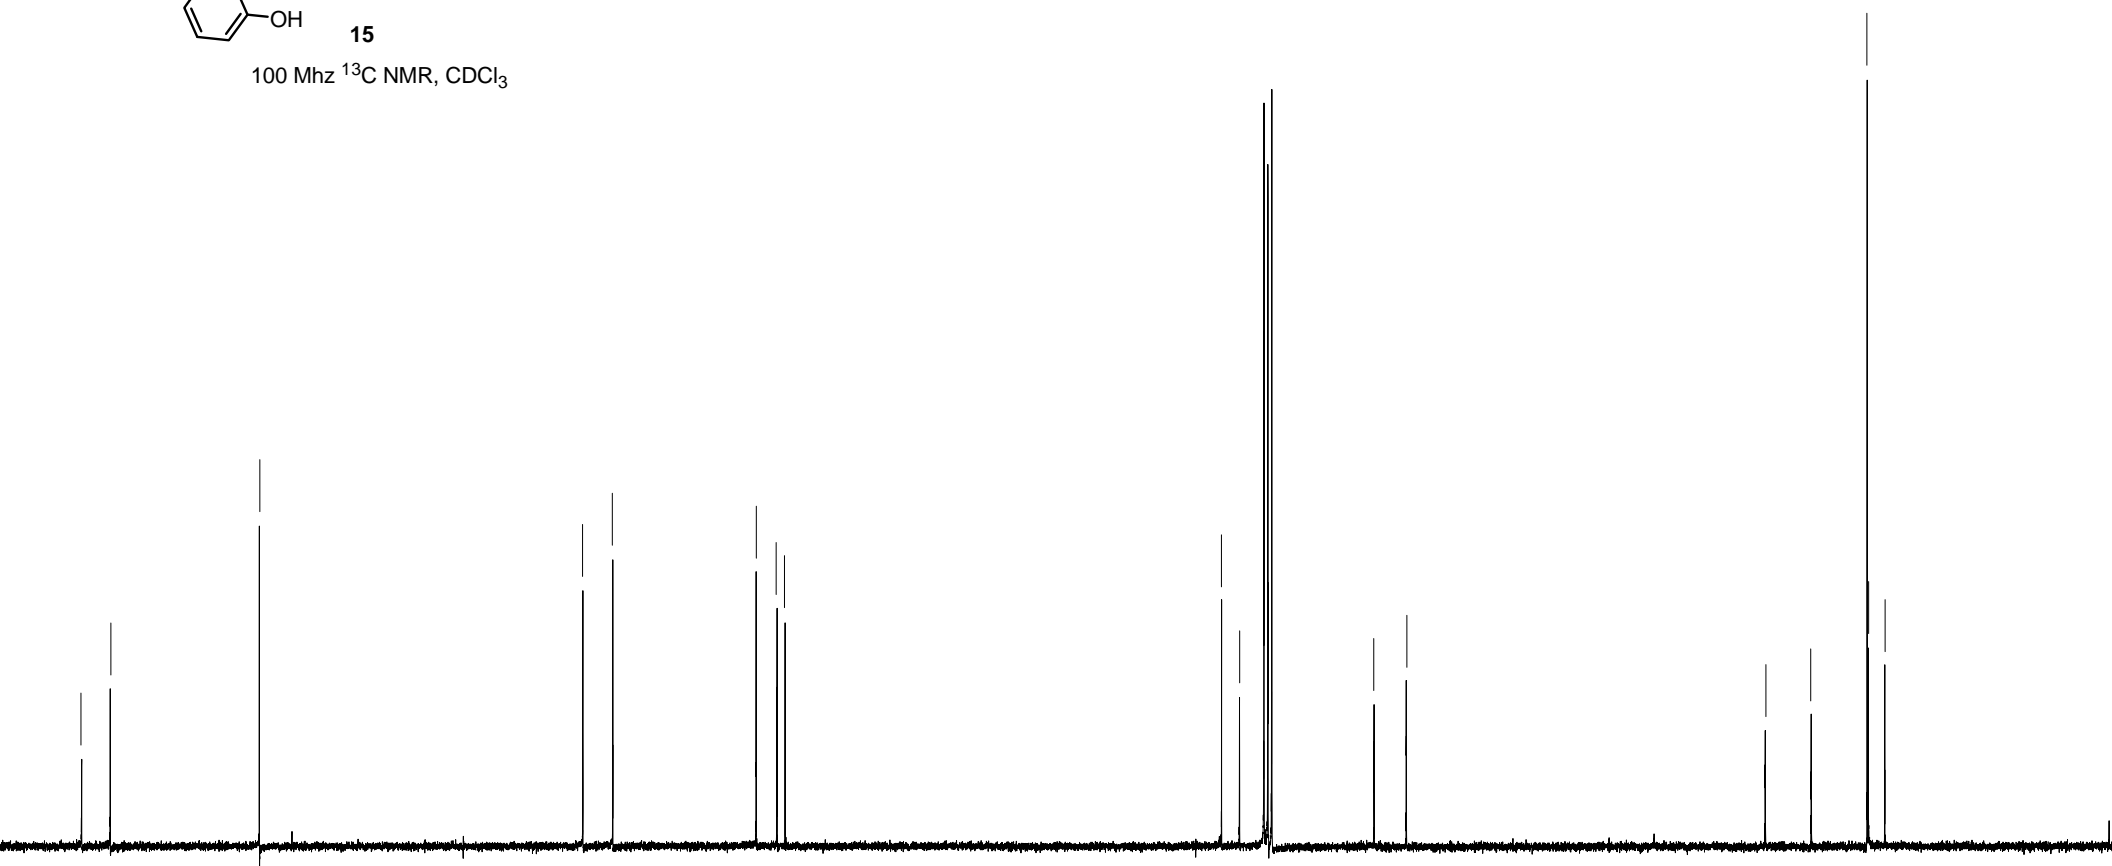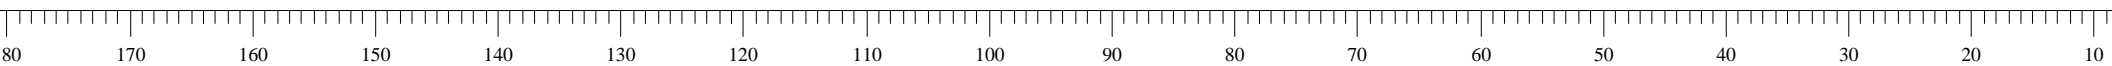

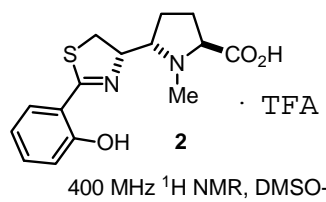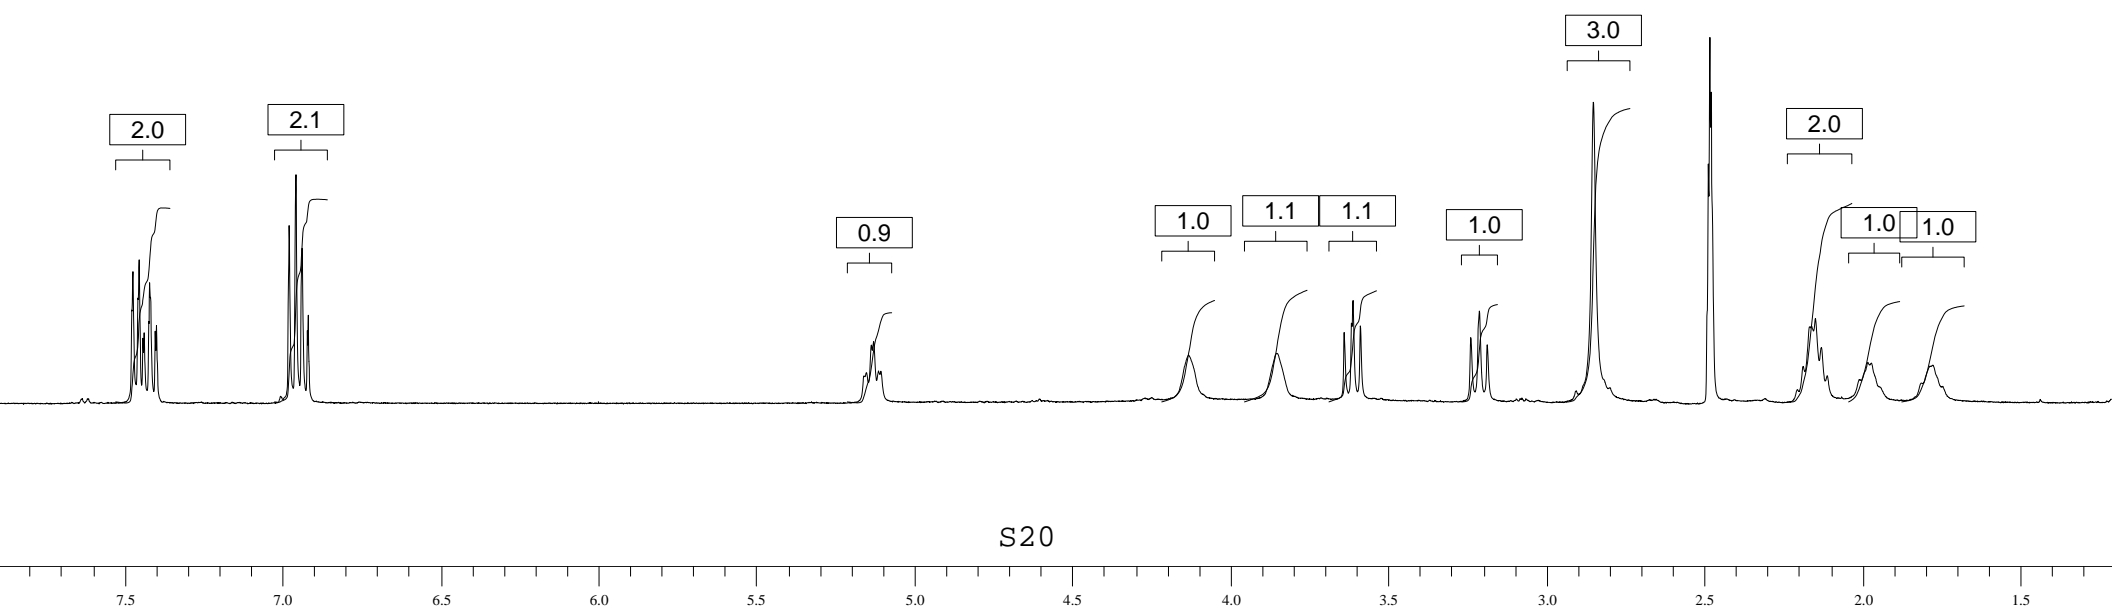

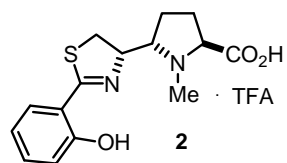

100 MHz  $^{13}\text{C}$  NMR, DMSO- $d_6$

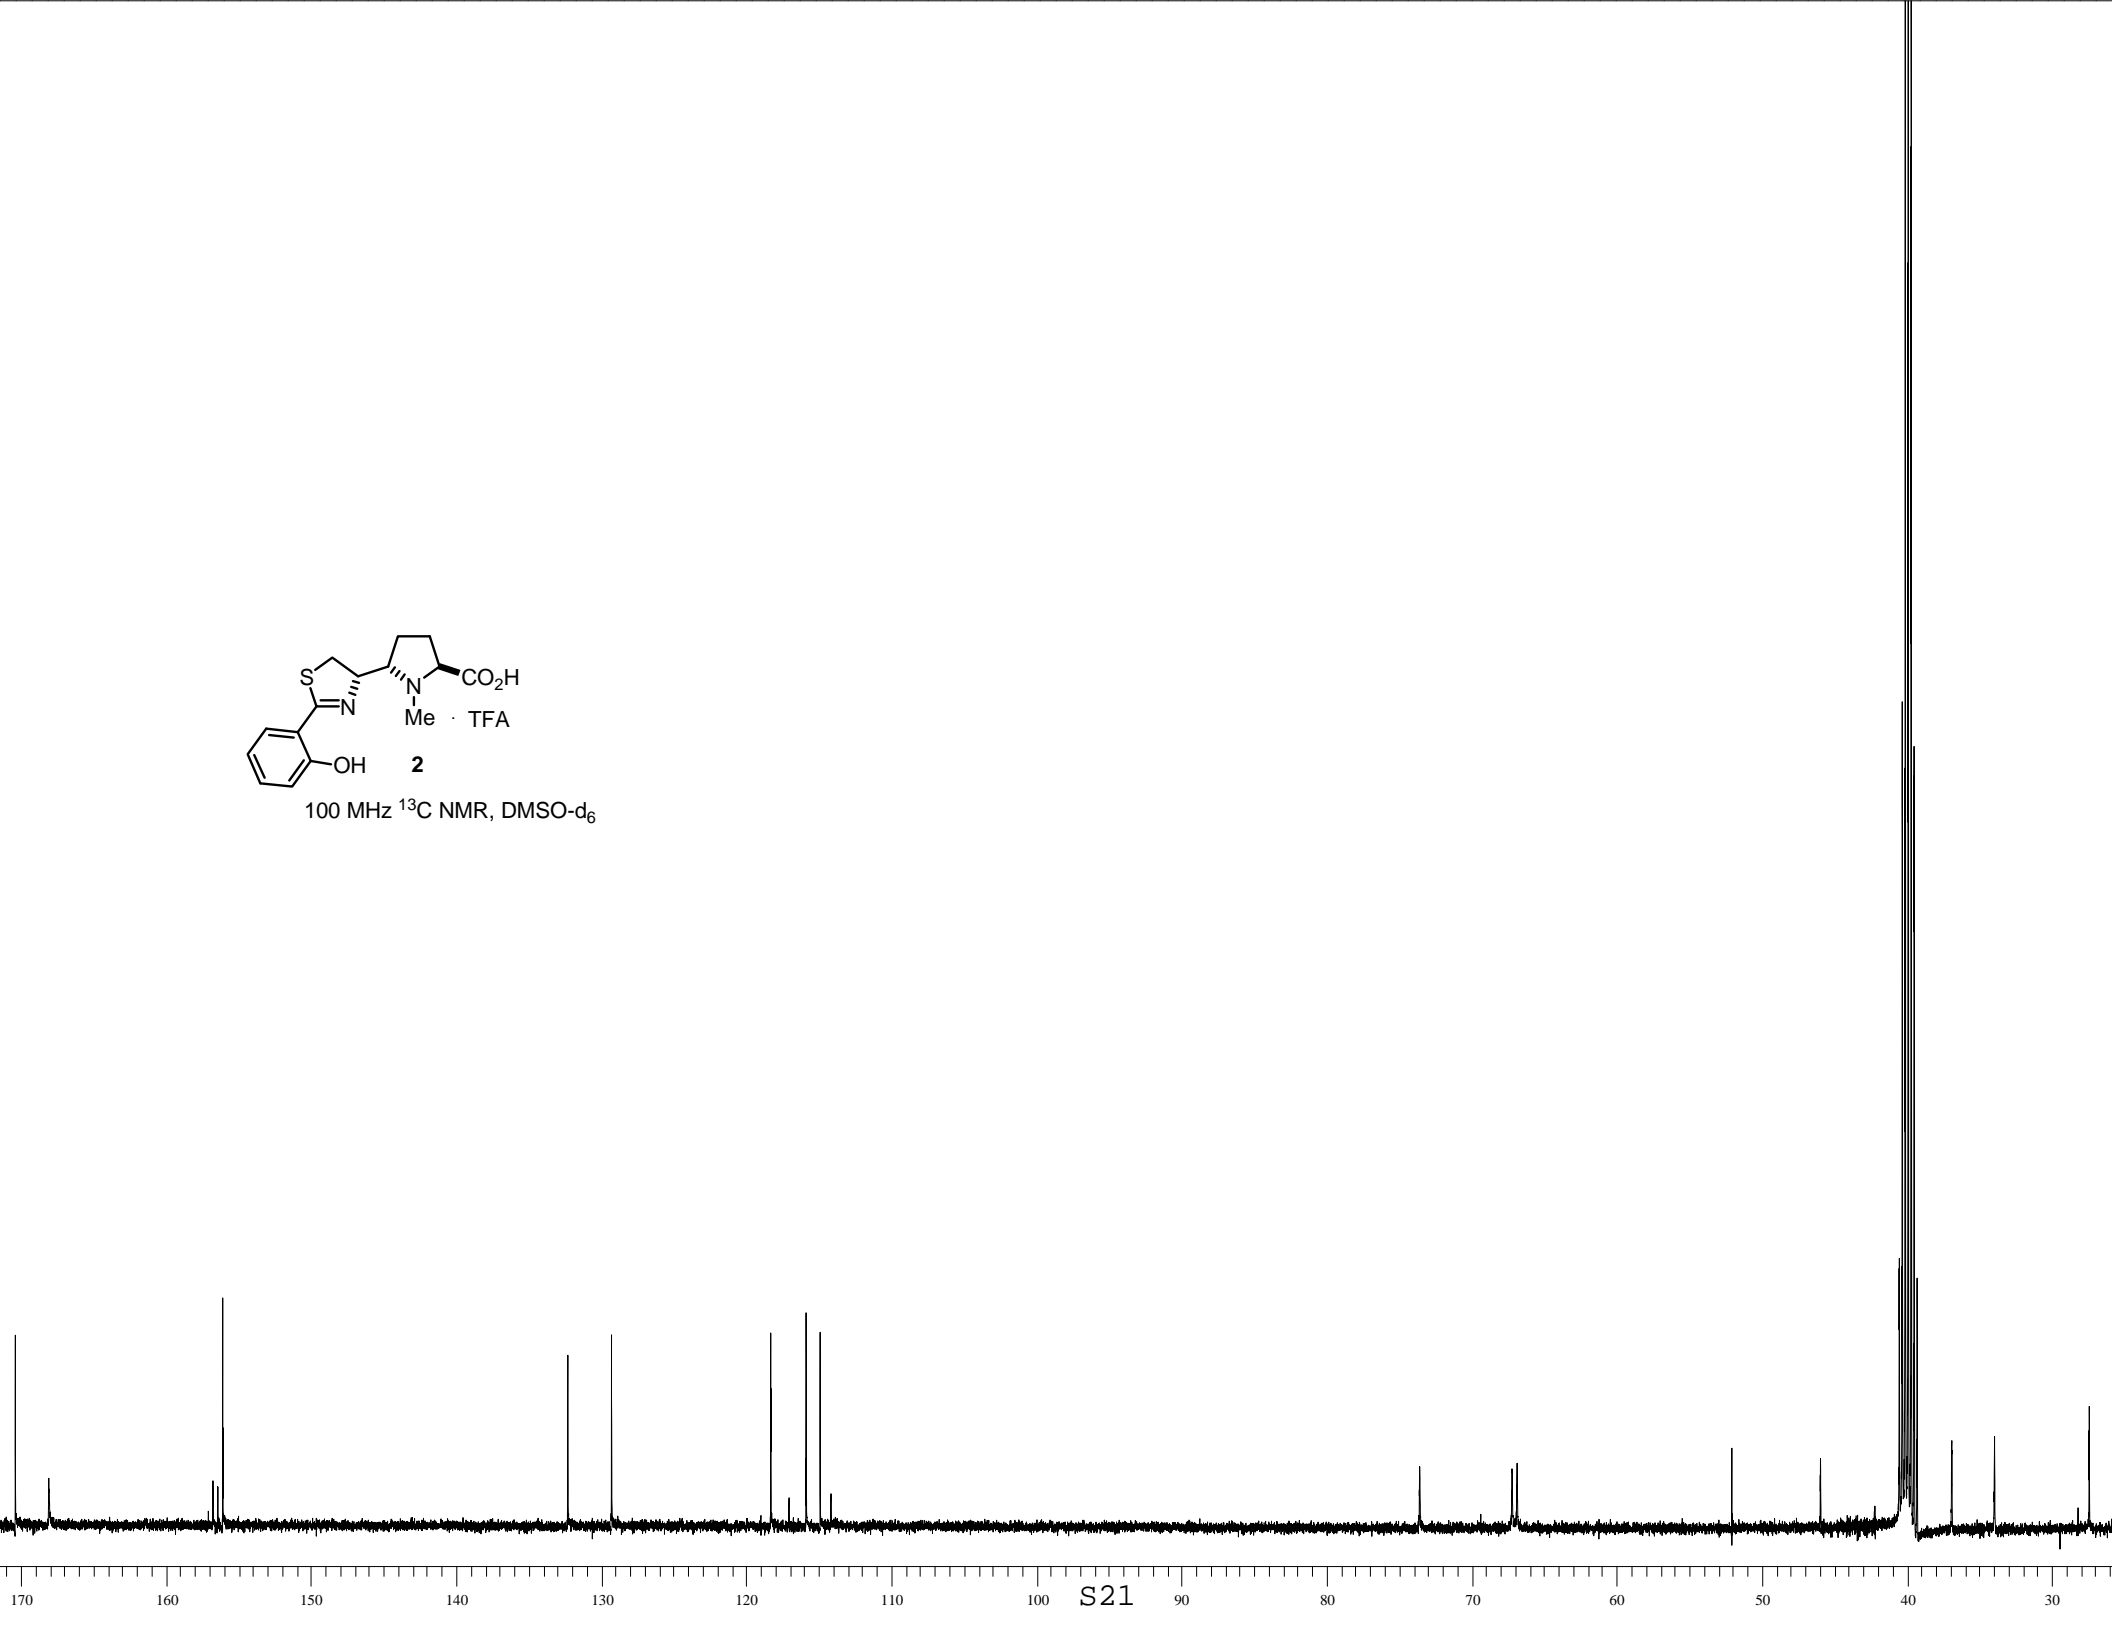

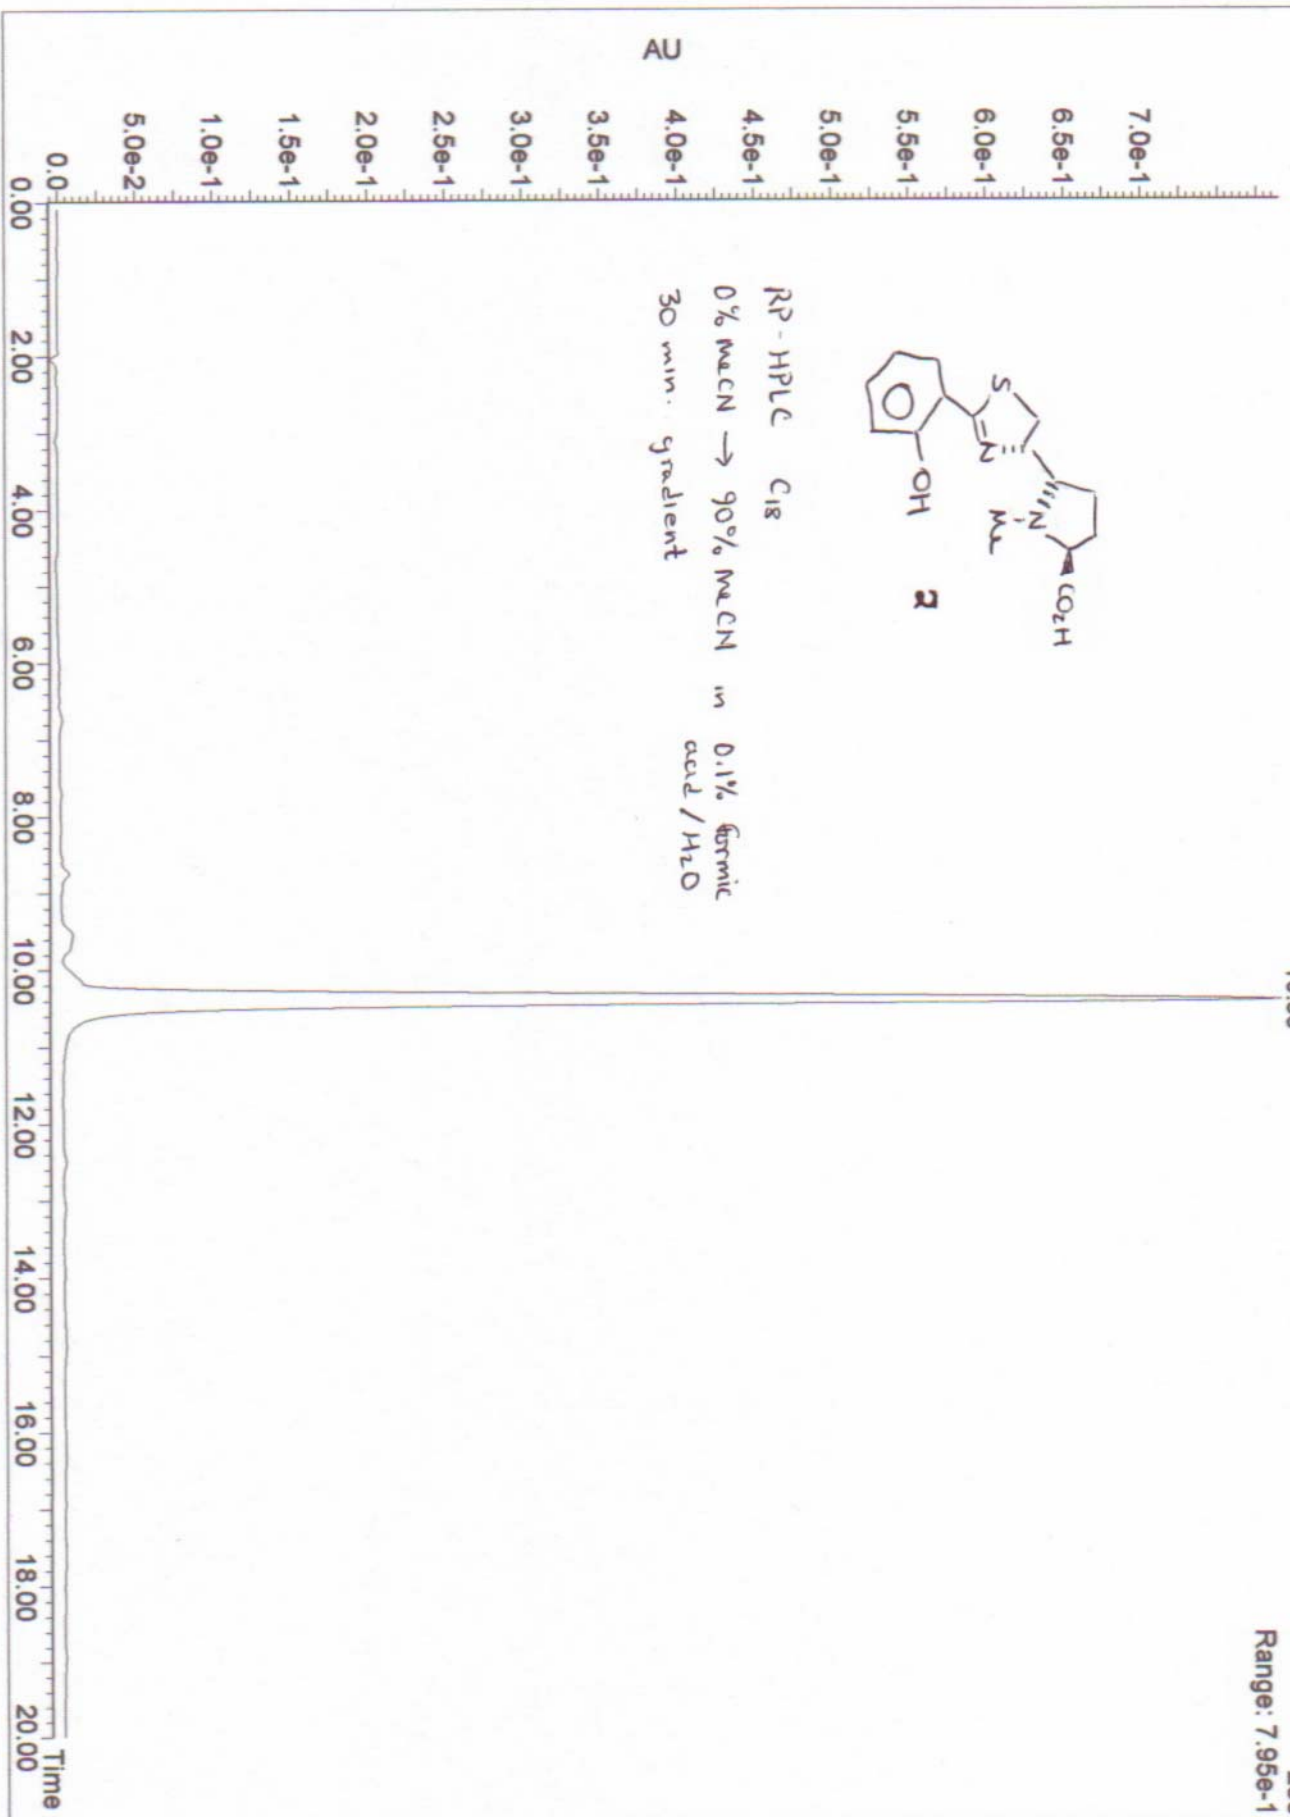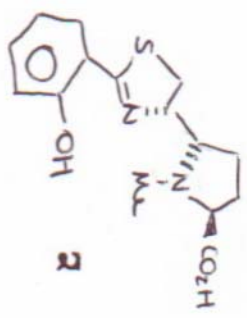

RP-HPLC C18  
0% MeCN → 90% MeCN in 0.1% formic acid / H<sub>2</sub>O  
30 min. gradient

JD-02-30B 1030 (10.386)

307.15

1: Scan ES+  
3.11e6

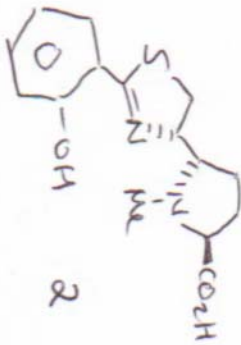

ESI-MS (+) For RT = 10.386 min.

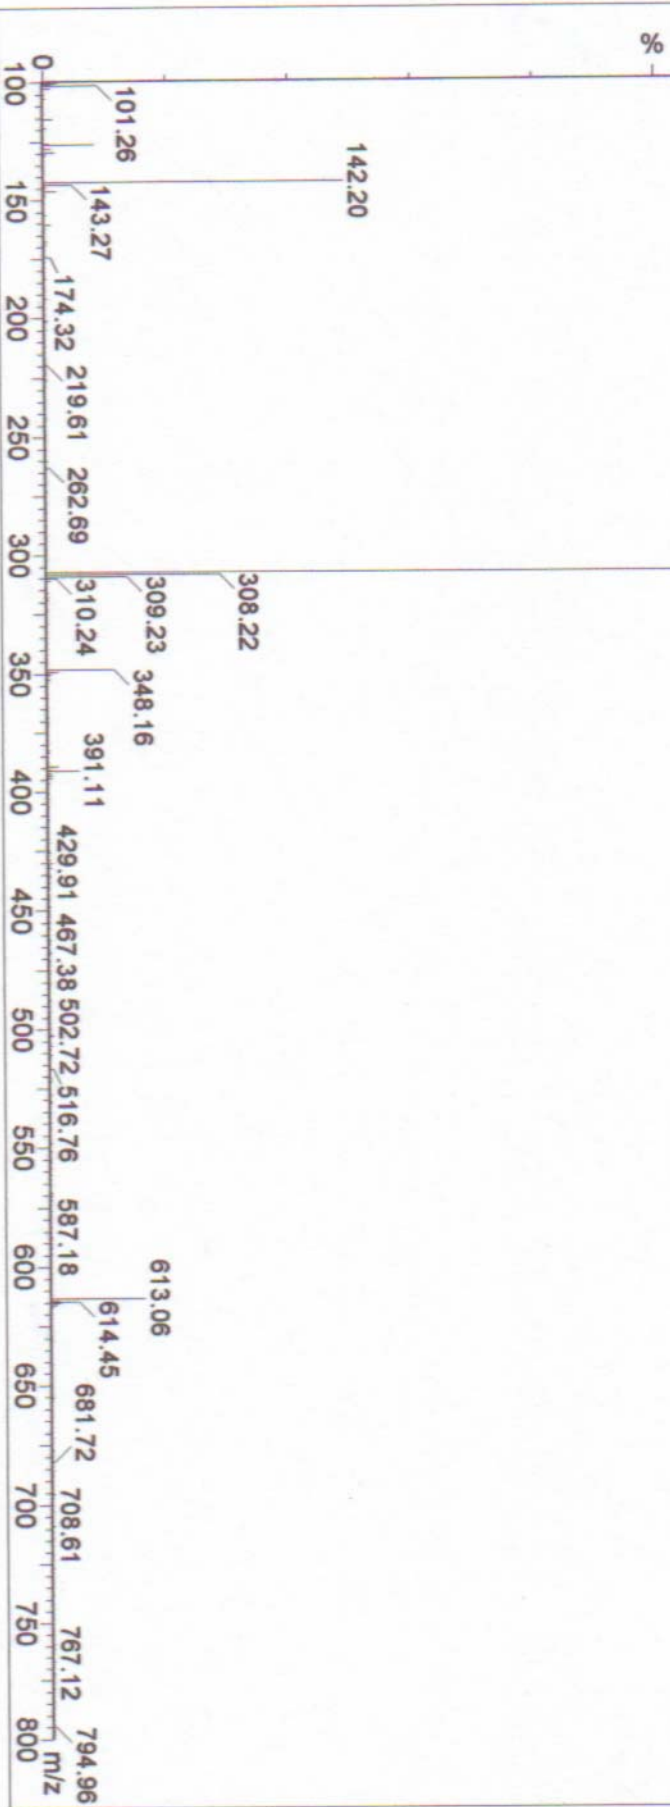

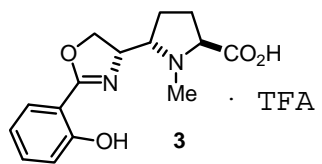

400 MHz <sup>1</sup>H NMR, DMSO-d<sub>6</sub>

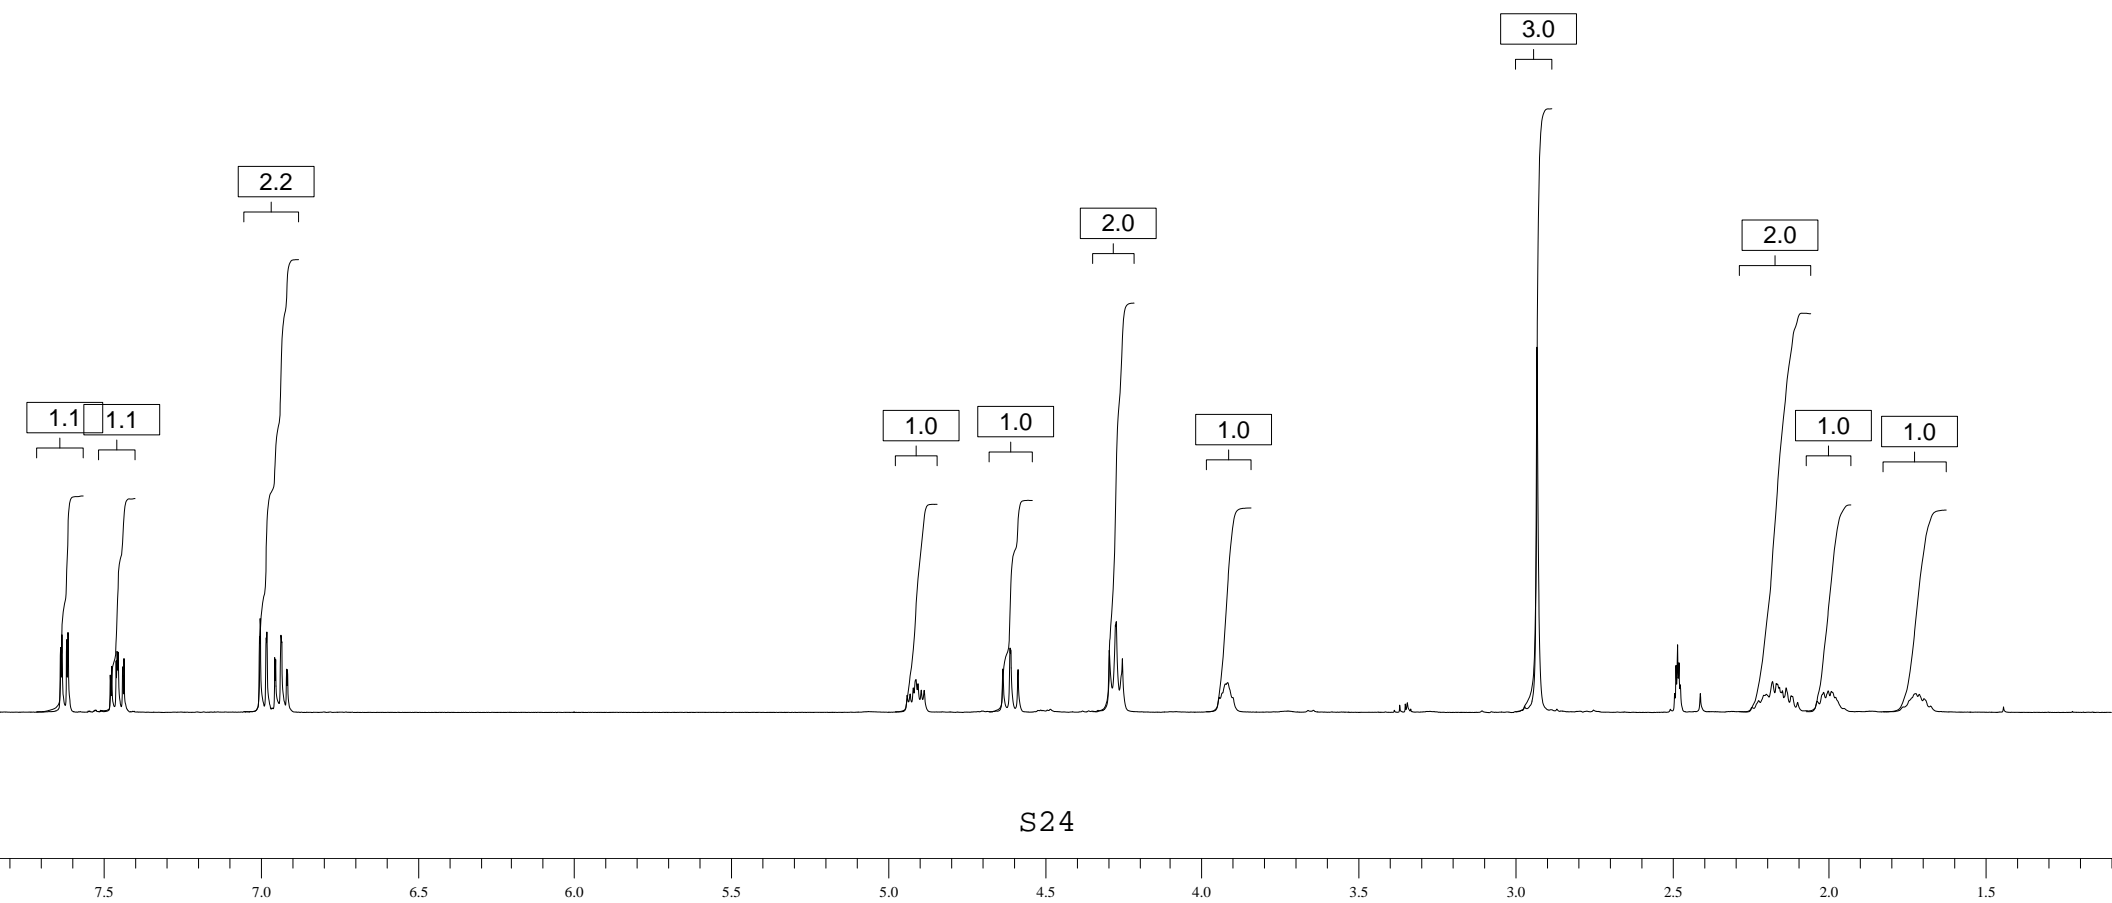



170.096  
166.276  
159.075  
134.220  
128.237  
119.137  
116.694  
109.625  
69.305  
66.737  
63.270  
51.875  
36.402  
26.670  
23.068

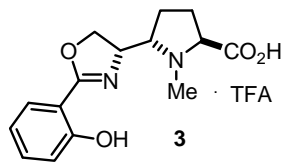

100 MHz <sup>13</sup>C NMR, DMSO-d<sub>6</sub>

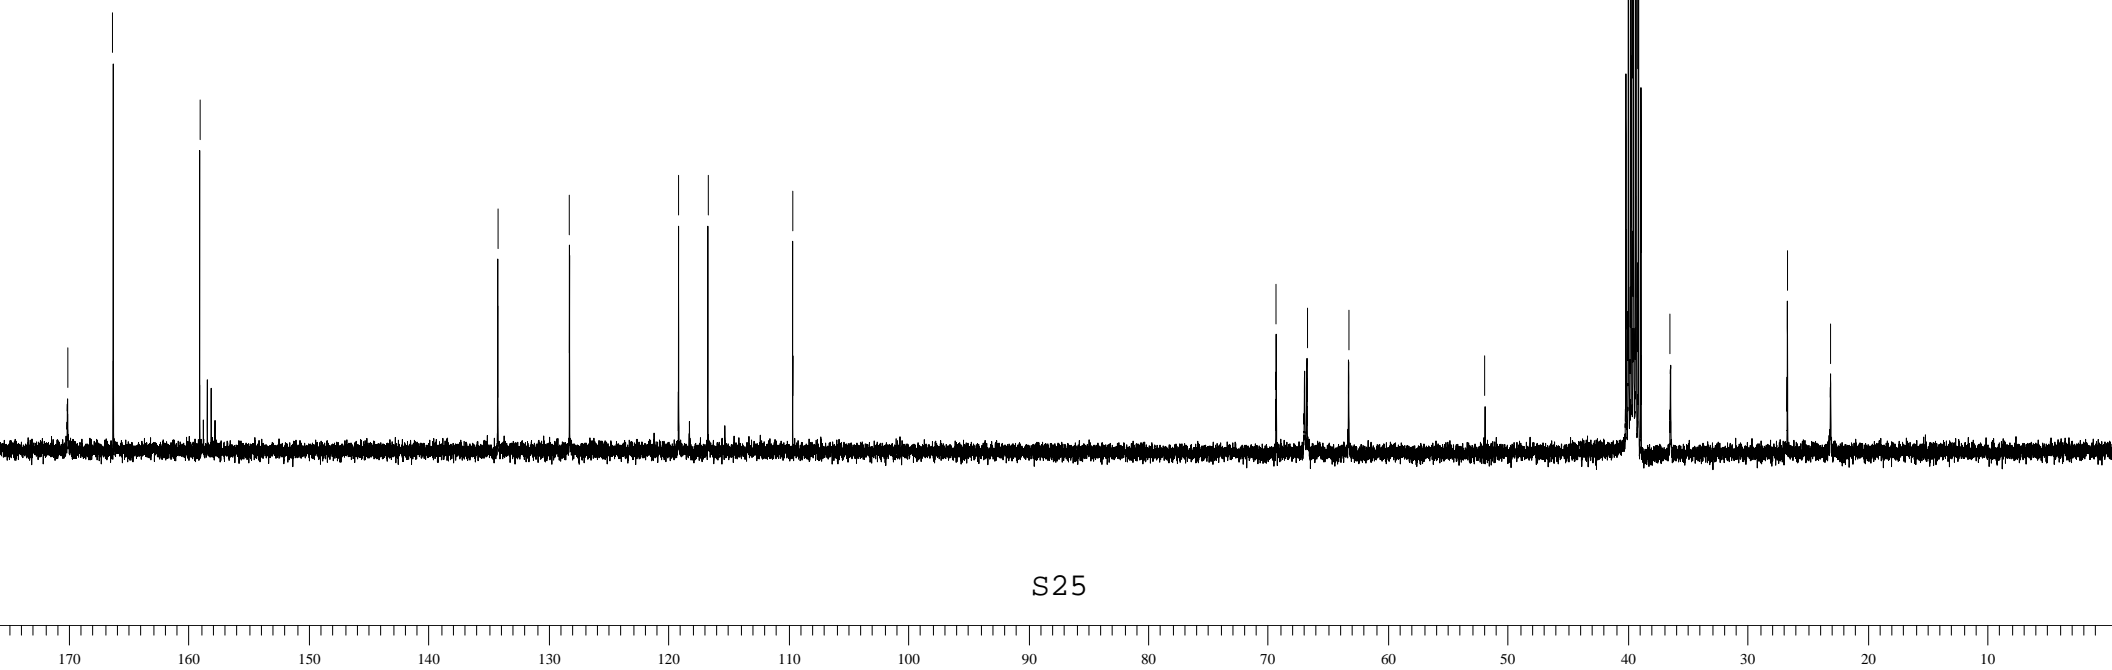

JD-02-31

2: Diode Array  
280  
Range: 1.528

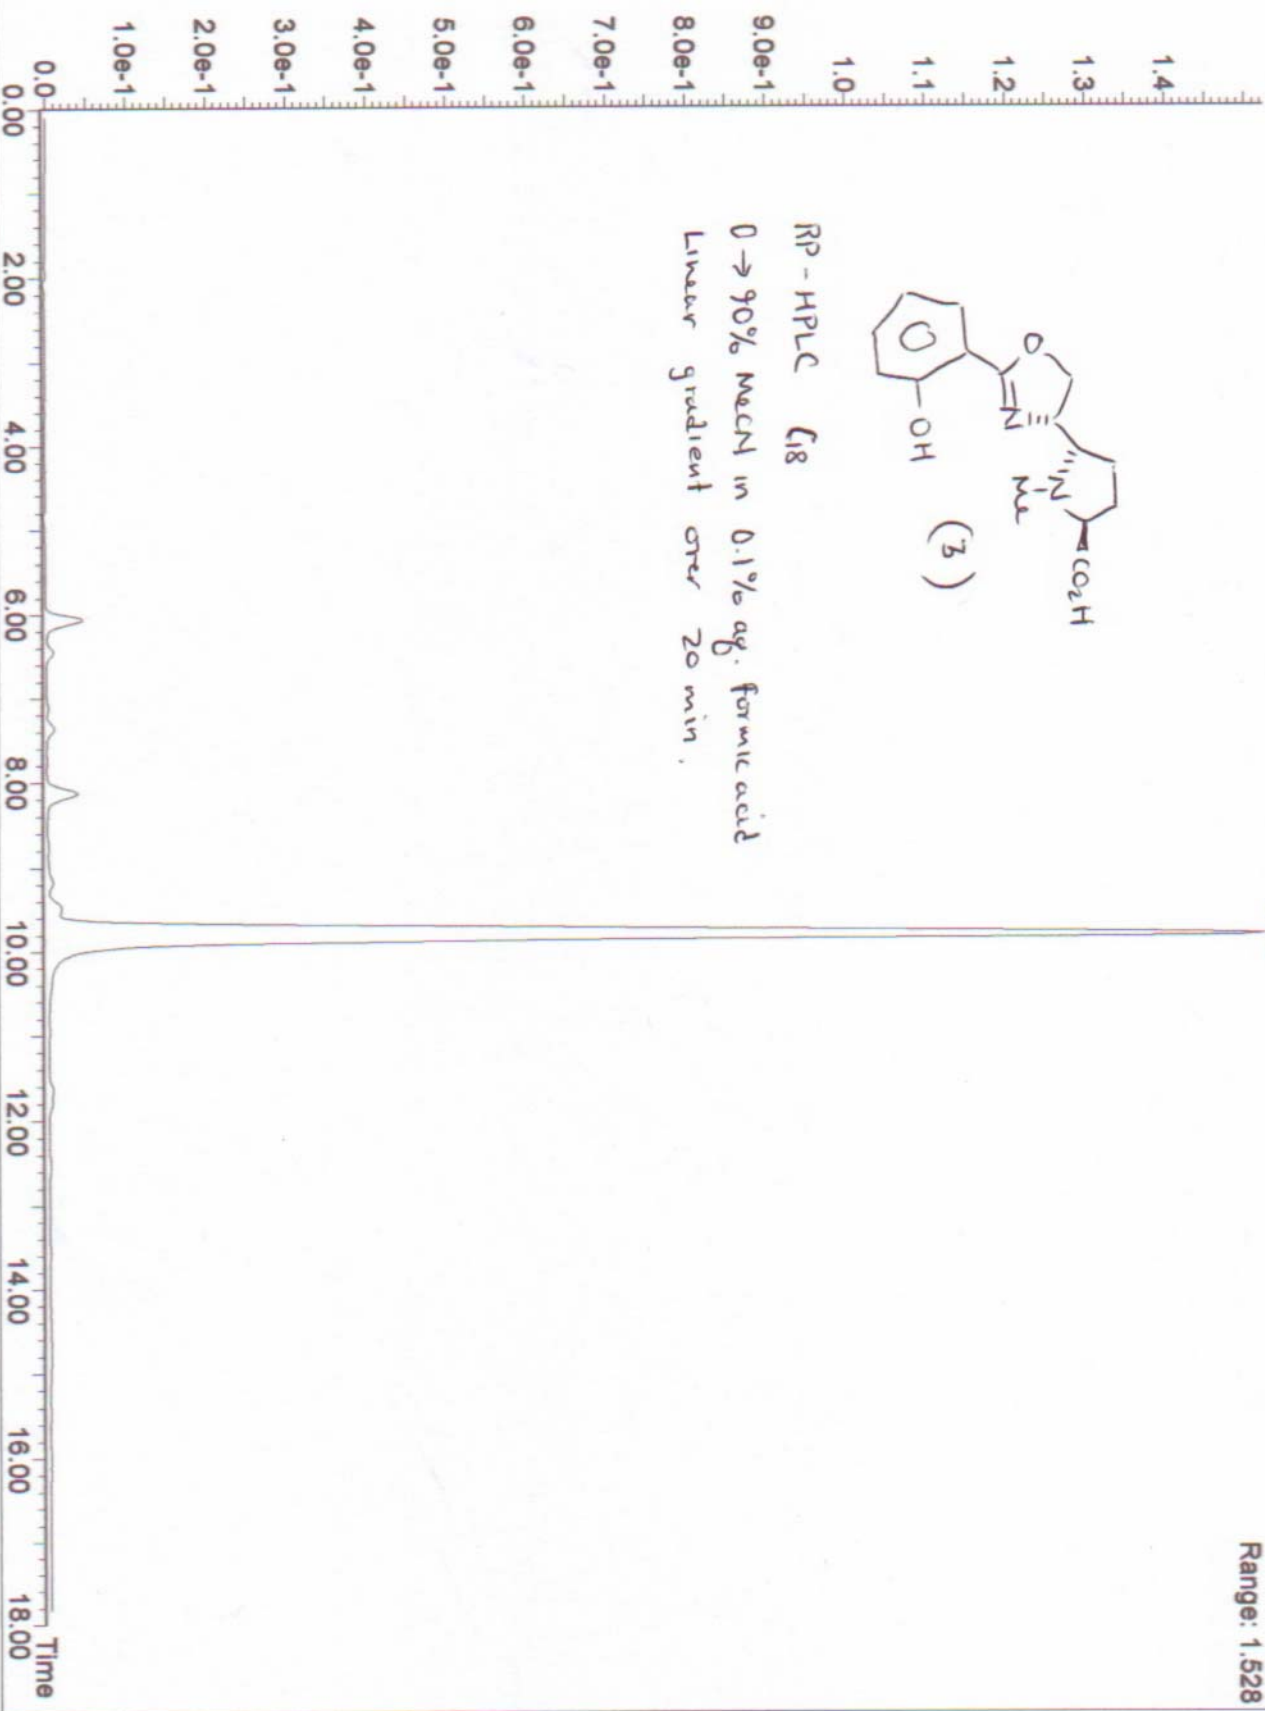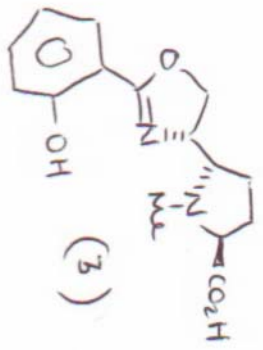

RP-HPLC (18)

0 → 90% MeCN in 0.1% aq. formic acid  
Linear gradient over 20 min.

AU

JD-02-31 968 (9.761)

291.16

1: Scan ES+  
6.80e6

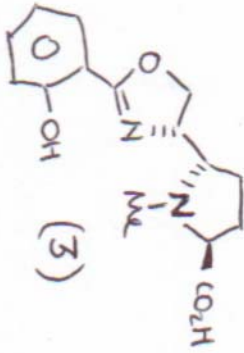

RP-HPLC C<sub>18</sub>  
ESI-MS(+) FOR *t*<sub>r</sub> = 9.76 min.

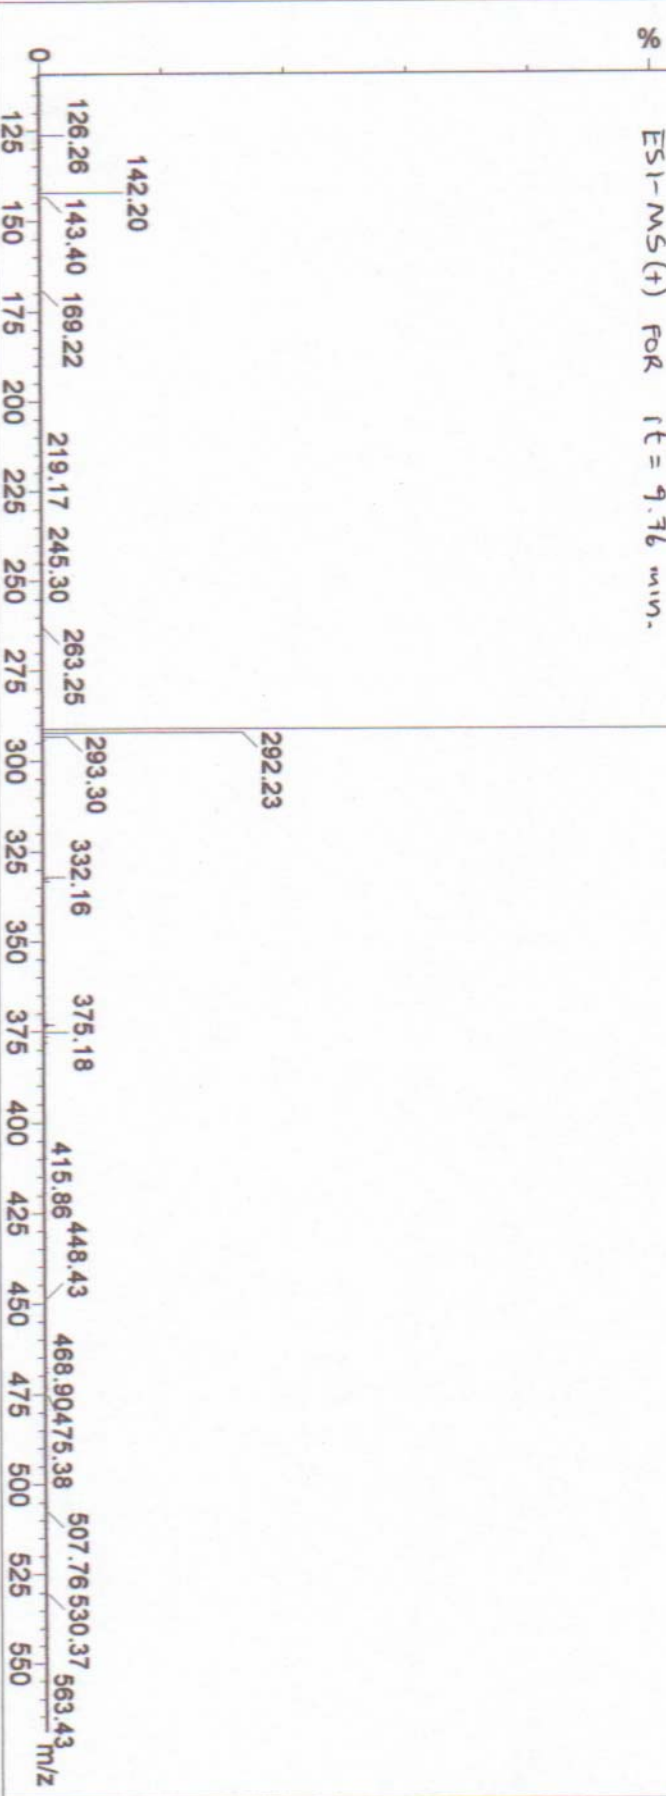

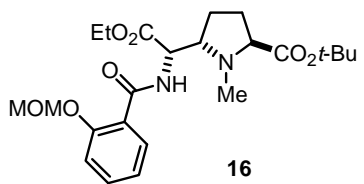

300 MHz <sup>1</sup>H NMR, CDCl<sub>3</sub>

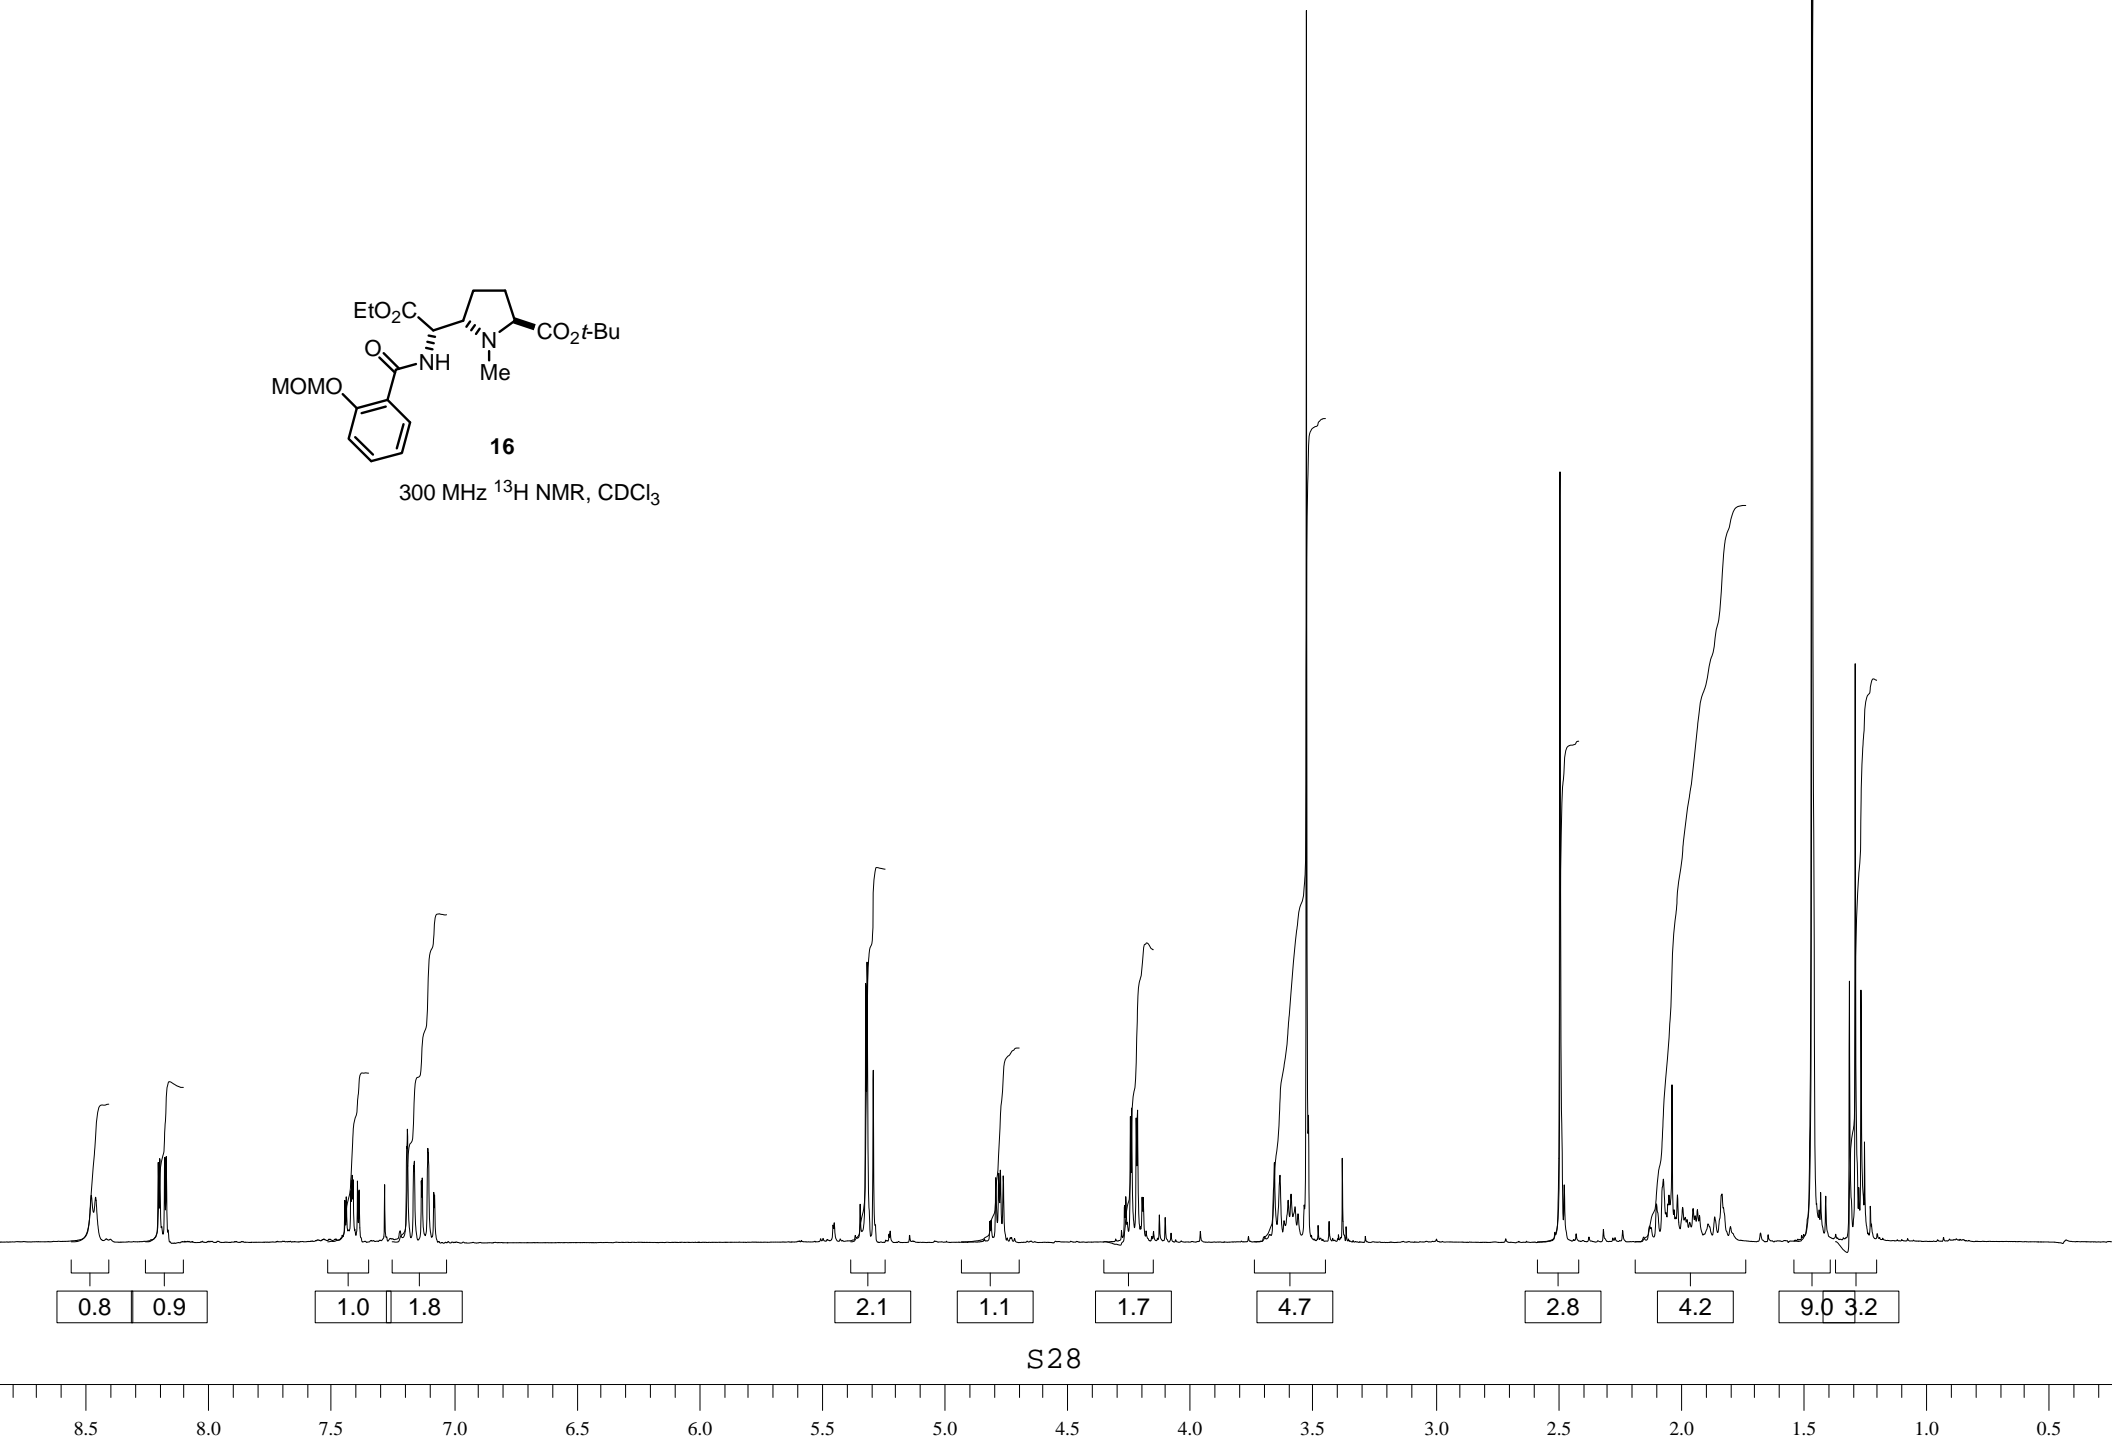

173.238  
171.157  
165.349  
155.396

132.784  
132.250  
122.251  
121.999  
114.616

94.961

81.056

67.641  
62.929  
61.089  
56.558  
54.033

34.987

28.197  
27.573  
25.420

14.231

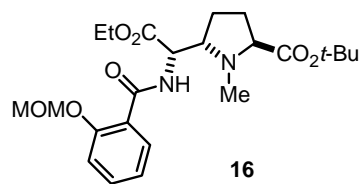

75 MHz  $^{13}\text{C}$  NMR,  $\text{CDCl}_3$

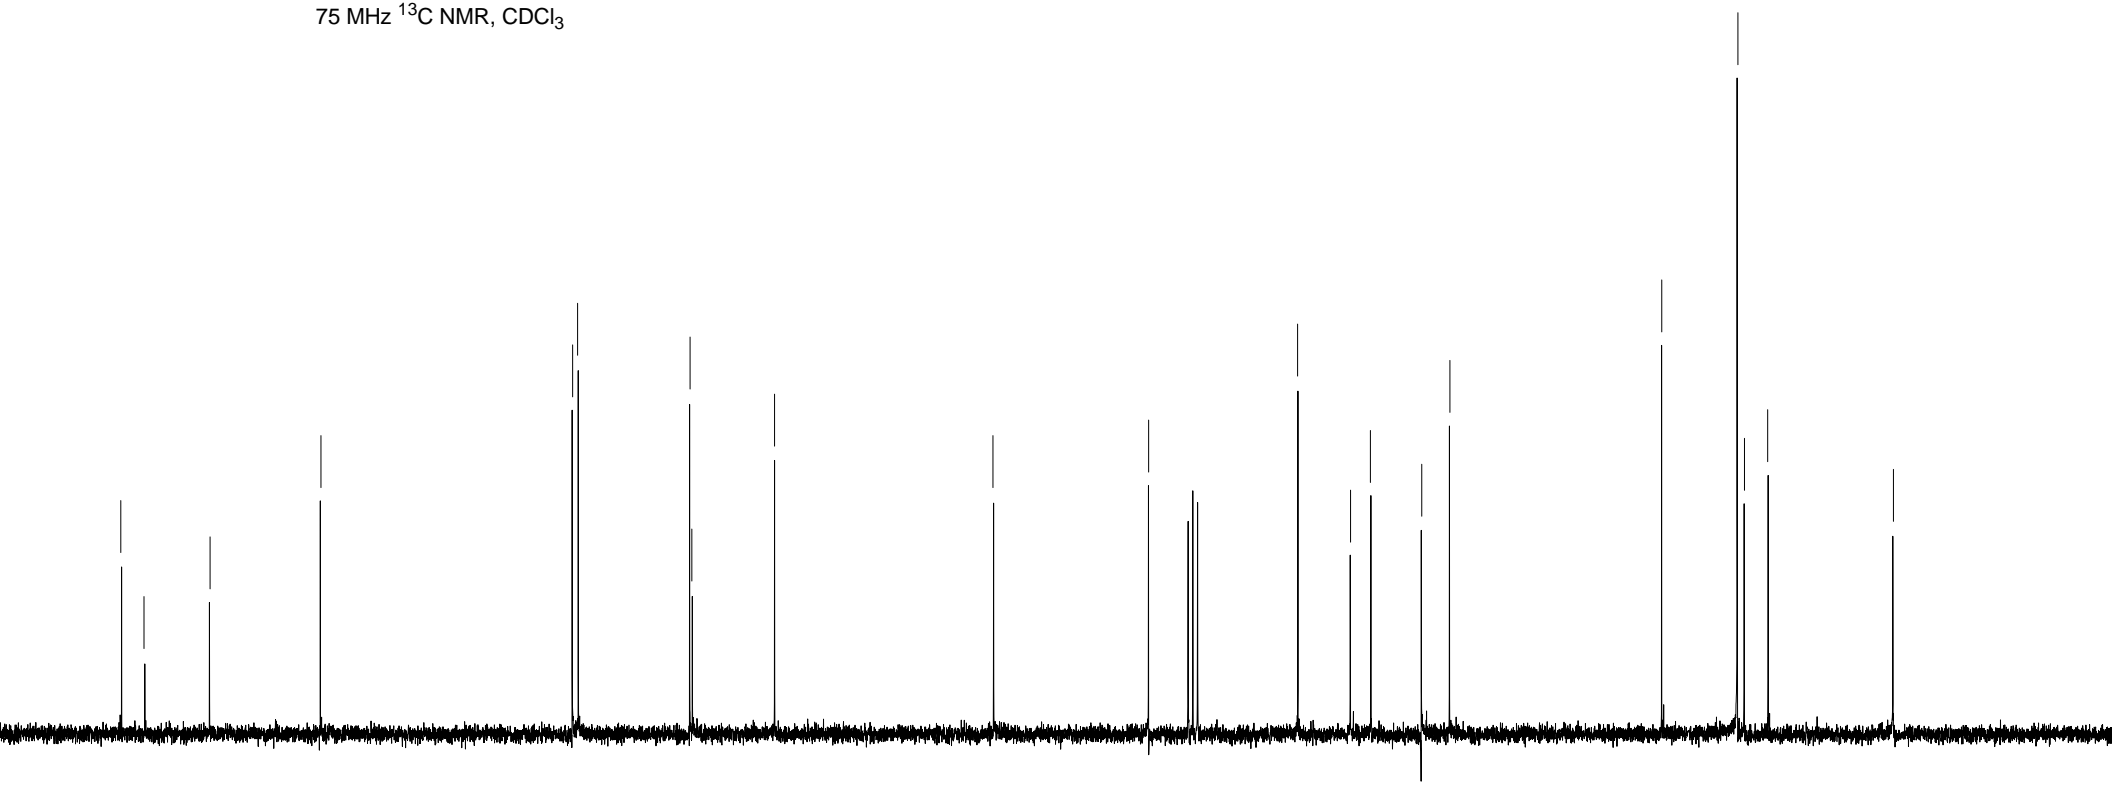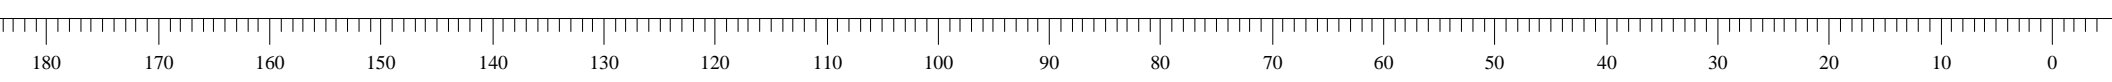

Table 1. Crystal data and structure refinement for **16**.

|                                   |                                                               |          |
|-----------------------------------|---------------------------------------------------------------|----------|
| Identification code               | <b>16</b>                                                     |          |
| Empirical formula                 | C <sub>23</sub> H <sub>34</sub> N <sub>2</sub> O <sub>7</sub> |          |
| Formula weight                    | 450.52                                                        |          |
| Temperature                       | 228(2) K                                                      |          |
| Wavelength                        | 0.71073 Å                                                     |          |
| Crystal system                    | Orthorhombic                                                  |          |
| Space group                       | P2(1)2(1)2(1)                                                 |          |
| Unit cell dimensions              | a = 9.0823(6) Å                                               | α = 90°. |
|                                   | b = 9.2605(7) Å                                               | β = 90°. |
|                                   | c = 29.233(2) Å                                               | γ = 90°. |
| Volume                            | 2458.7(3) Å <sup>3</sup>                                      |          |
| Z                                 | 4                                                             |          |
| Density (calculated)              | 1.217 Mg/m <sup>3</sup>                                       |          |
| Absorption coefficient            | 0.090 mm <sup>-1</sup>                                        |          |
| F(000)                            | 968                                                           |          |
| Crystal size                      | 0.46 x 0.41 x 0.37 mm <sup>3</sup>                            |          |
| Theta range for data collection   | 3.07 to 30.50°.                                               |          |
| Index ranges                      | -12 ≤ h ≤ 12, -13 ≤ k ≤ 13, -41 ≤ l ≤ 41                      |          |
| Reflections collected             | 65942                                                         |          |
| Independent reflections           | 4224 [R(int) = 0.0374]                                        |          |
| Completeness to theta = 30.50°    | 99.8 %                                                        |          |
| Absorption correction             | Semi-empirical from equivalents                               |          |
| Max. and min. transmission        | 0.970 and 0.960                                               |          |
| Refinement method                 | Full-matrix least-squares on F <sup>2</sup>                   |          |
| Data / restraints / parameters    | 4224 / 0 / 307                                                |          |
| Goodness-of-fit on F <sup>2</sup> | 1.038                                                         |          |
| Final R indices [I > 2σ(I)]       | R1 = 0.0397, wR2 = 0.1024                                     |          |
| R indices (all data)              | R1 = 0.0496, wR2 = 0.1106                                     |          |
| Largest diff. peak and hole       | 0.219 and -0.157 e.Å <sup>-3</sup>                            |          |

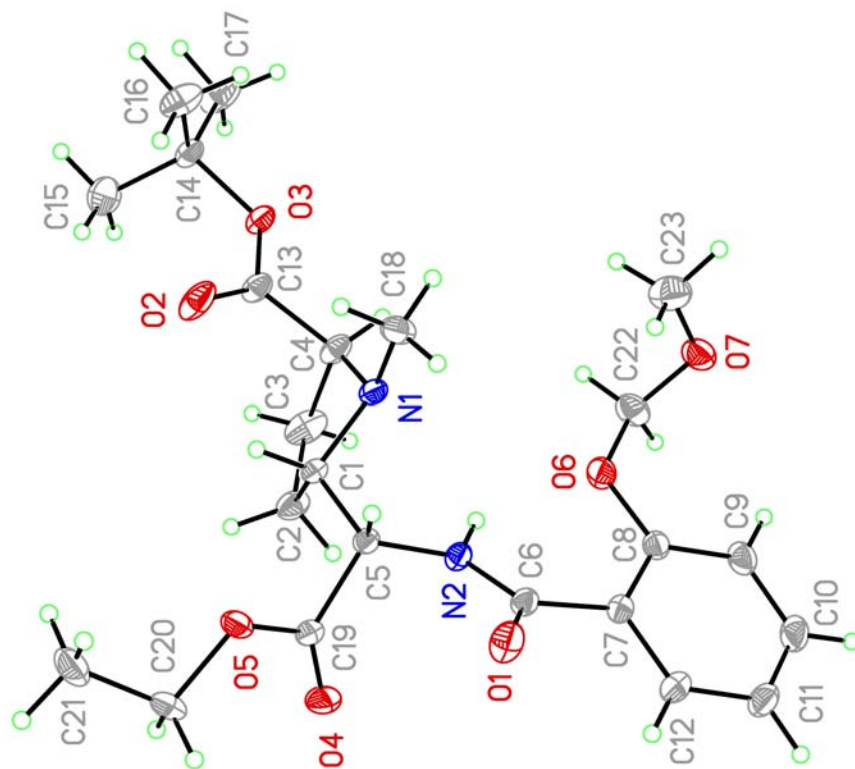

Compound **16** single molecule view, all thermal ellipsoids at 20% probability
